# Supplementary material for: Metal-free, atom and redox-economical construction of C–C bonds enabled by oligofluorene-containing hypercrosslinked polymers
Source: Royal Society of Chemistry journal article supplement (doi:10.1039/d2gc00107a), 2022-01-01

*Electronic Supplementary Information for*

**Metal-Free, Atom and Redox-Economical Construction of C-C  
Bonds Enabled by Oligofluorenes-Containing  
Hyperscrosslinked Polymers**

Feng Lan,<sup>a</sup> Cen Zhou,<sup>\*b</sup> Xiaozhou Huang,<sup>a</sup> Bohang An,<sup>a</sup> and Xiao Zhang<sup>\*a</sup>

<sup>a</sup>Fujian Key Laboratory of Polymer Materials, Fujian Provincial Key Laboratory of Advanced Materials Oriented Chemical Engineering, College of Chemistry and Materials Science, Fujian Normal University, 8 Shangsang Lu, Fuzhou 350007, China.

E-mail: [zhangxiao@fjnu.edu.cn](mailto:zhangxiao@fjnu.edu.cn)

<sup>b</sup>Fujian Engineering and Research Center of New Chinese Lacquer Materials, College of Materials and Chemical Engineering, Minjiang University, Fuzhou 350108, China.

E-mail: [zhoucen@mju.edu.cn](mailto:zhoucen@mju.edu.cn)

## Table of Contents

|                                                                                   |            |
|-----------------------------------------------------------------------------------|------------|
| <b>1. General Information.....</b>                                                | <b>S3</b>  |
| <b>2. Synthesis .....</b>                                                         | <b>S4</b>  |
| <b>3. Characterization of TX-HCP and IsoTX-HCP .....</b>                          | <b>S6</b>  |
| <b>4. General Procedure for Visible-Light-Induced of C-C Bond Formations.....</b> | <b>S11</b> |
| <b>5. Recyclability Tests of TX-HCP .....</b>                                     | <b>S20</b> |
| <b>6. References.....</b>                                                         | <b>S21</b> |
| <b>7. Copies of NMR Spectra .....</b>                                             | <b>S22</b> |

## 1. General Information

Unless stated otherwise, all reactions were carried out in flame-dried glassware under a dry nitrogen atmosphere. All reagents were commercially purchased and used without any further purification.  $^1\text{H}$  spectra were recorded on a Bruker instrument (400 MHz) and internally referenced to tetramethylsilane signal or residual protic solvent signals. Data for  $^1\text{H}$  NMR are recorded as follows: chemical shift ( $\delta$ , ppm), multiplicity (s = singlet, d = doublet, t = triplet, m = multiplet or unresolved, br = broad singlet, coupling constant(s) in Hz, integration). Data for  $^{13}\text{C}$  NMR are reported in terms of chemical shift ( $\delta$ , ppm).

Powder X-ray diffraction (PXRD) was recorded on a PANalytical X'pert PRO X-ray Diffractometer using Cu-K $\alpha$  radiation in the  $2\theta$  range of 10-90°. The nitrogen adsorption-desorption isotherms at 77 K were measured with a Micromeritics ASAP2460 analyzers, and the BET surface area was estimated by the Brunauer-Emmett-Teller (BET) theory. Fourier Transform Infrared spectra were recorded with a Nicolet iS50 FT-IR spectrophotometer. UV-vis diffuse reflectance spectra (DRS) were performed on a Perkin Elmer Lambda 750 in the 300~800 nm range, with BaSO $_4$  as the reference substance. Electrochemical measurements were performed on an electrochemical workstation (CHI 660E, CH Instruments Inc., Shanghai). Thermogravimetric analysis (TGA) profiles were recorded on a METTLER TGA/SDTA 851 thermal analyzer. Scanning electron microscopy (SEM) images were recorded using a Phenomenon LE electron microscope. Multifunctional imaging electron spectrometer (XPS) measurements were carried out using Thermo ESCALAB 250Xi spectrometer.

## 2. Synthesis

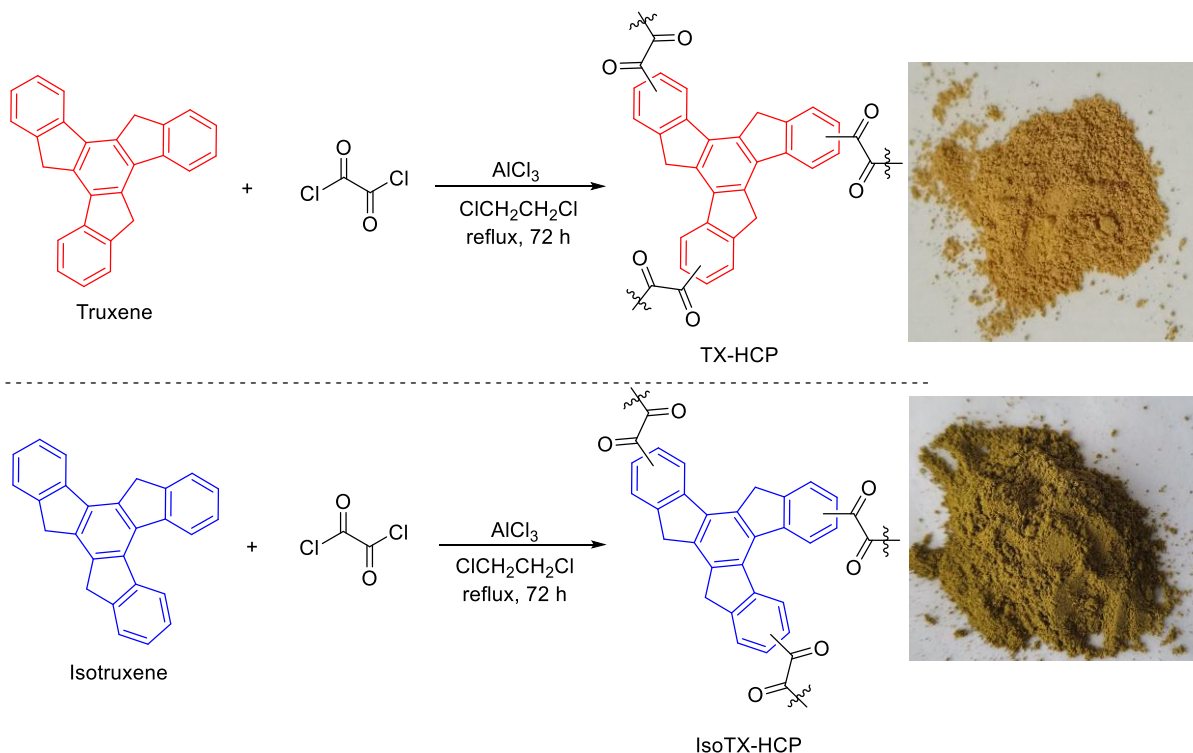

### Synthesis of TX-HCP:

Following a literature reported procedure<sup>[1]</sup>, oxalyl chloride (0.34 mL, 3.90 mmol) was added to a solution of  $\text{AlCl}_3$  (519 mg, 3.90 mmol, anhydrous) and truxene (1.0 g, 2.92 mmol) in 1,2-dichloroethane (DCE, 15 mL). The resulting mixture was stirred under nitrogen atmosphere at 85 °C for 72 h to complete the cross-linking. Afterwards, the reaction mixture was cooled to room temperature and the obtained precipitate was washed with dilute hydrochloric acid, water, acetone, ethanol, ethyl acetate and dichloromethane, respectively. The product TX-HCP was collected and dried under vacuum as a yellow solid (1.1 g).

### Synthesis of IsoTX-HCP:

Following a literature reported procedure,<sup>[1]</sup> oxalyl chloride (0.34 mL, 3.90 mmol) was added to a solution of  $\text{AlCl}_3$  (519 mg, 3.90 mmol, anhydrous) and isotruene (1.0 g, 2.92

mmol) in 1,2-dichloroethane (DCE, 15 mL). The resulting mixture was stirred under nitrogen atmosphere at 85 °C for 72 h to complete the cross-linking. Afterwards, the reaction mixture was cooled to room temperature and the obtained precipitate was washed with dilute hydrochloric acid, water, acetone, ethanol, ethyl acetate and dichloromethane, respectively. The product IsoTX-HCP was collected and dried under vacuum as a green solid (0.63 g).

## **Synthesis of substrates**

### **Preparation of 1:**

Substrates **1t-1w** were synthesized according to the reported literature.<sup>[2]</sup>

### **Preparation of 2:**

To a flask were added the substrate aldehyde (1.0 equiv), malononitrile (1.5 equiv), K<sub>2</sub>CO<sub>3</sub> (0.5 equiv), and dichloromethane (20 mL). The mixture was stirred at room temperature for the indicated time (monitored by TLC). Afterwards, the resulting solution was washed with H<sub>2</sub>O (20 mL), and extracted with dichloromethane (10 mL × 3), the organic layer was washed with brine (20 mL × 4) and dried over Na<sub>2</sub>SO<sub>4</sub>. After filtration, the solvent was evaporated under reduced pressure, the residue was purified by silica gel flash column chromatography using ethyl acetate/petroleum ether as the eluent to afford the desired products **2**.

### 3. Characterization of TX-HCP and IsoTX-HCP

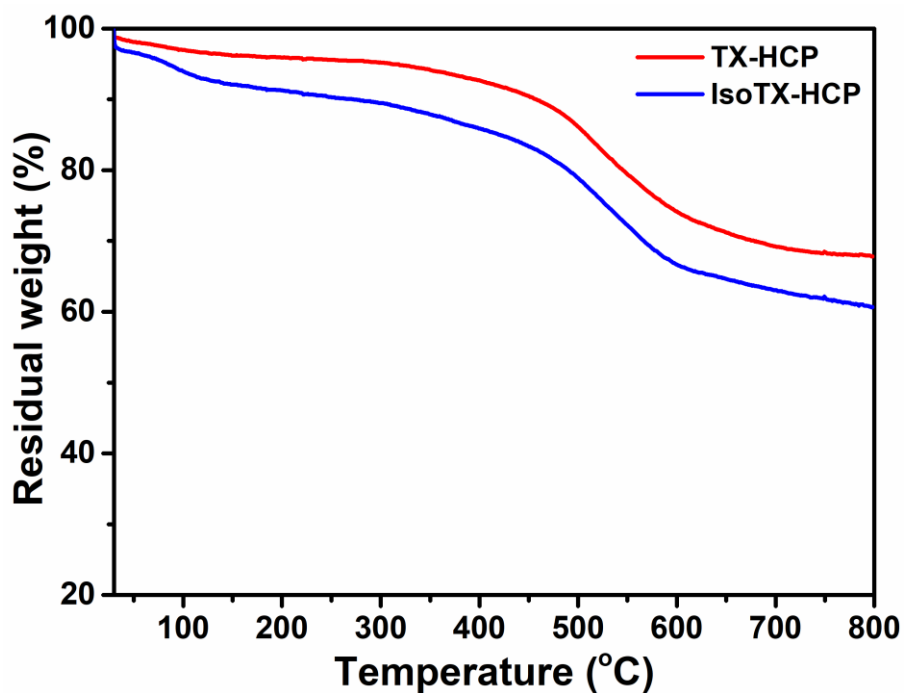

Fig. S1 TGA spectra of TX-HCP and IsoTX-HCP.

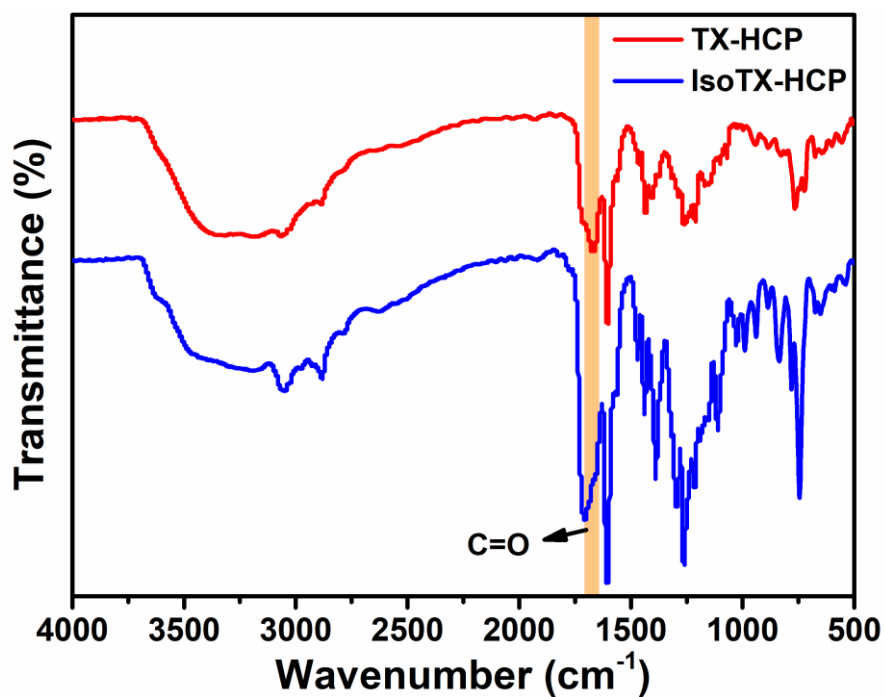

Fig. S2 FTIR spectra of TX-HCP and IsoTX-HCP.

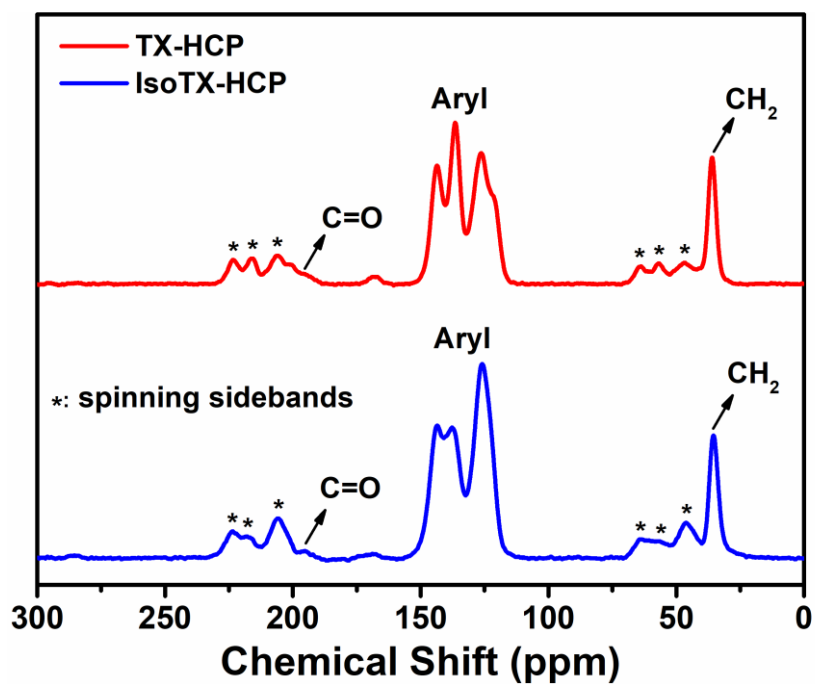

**Fig. S3** Solid-state  $^{13}\text{C}$  CP/MAS NMR spectra of TX-HCP and IsoTX-HCP.

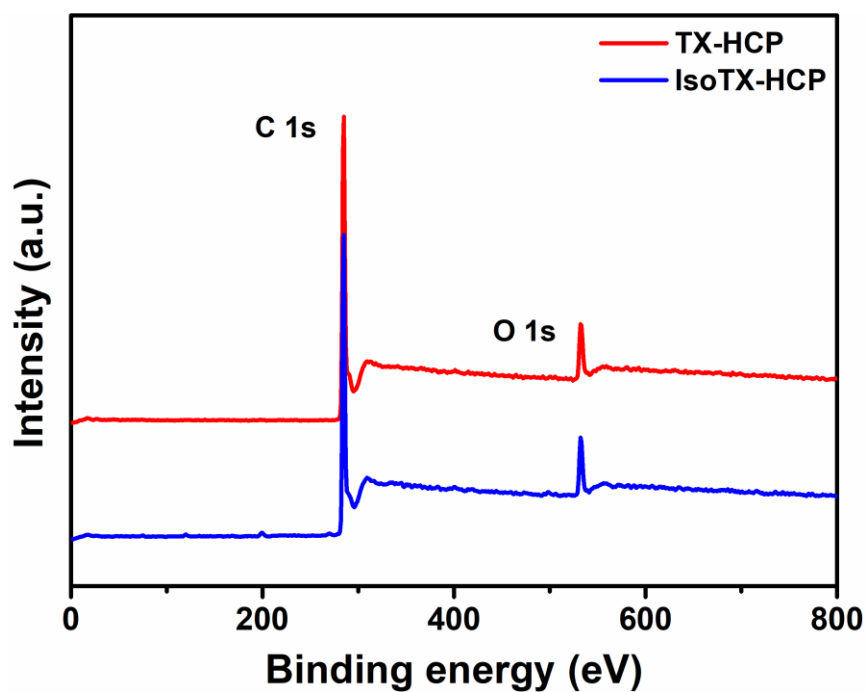

**Fig. S4** XPS survey scan spectra of TX-HCP and IsoTX-HCP.

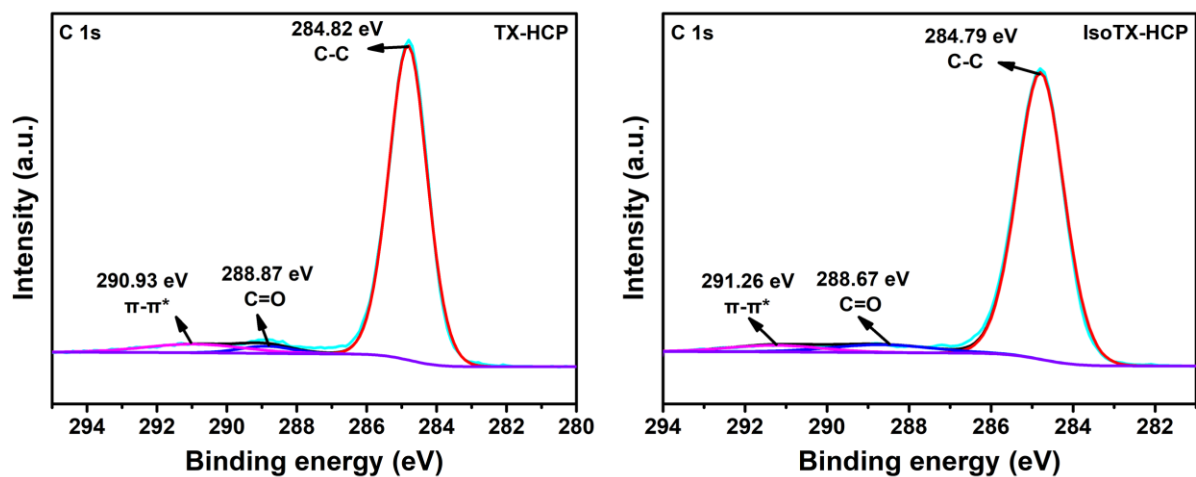

Fig. S5 C1s XPS spectra of TX-HCP and IsoTX-HCP.

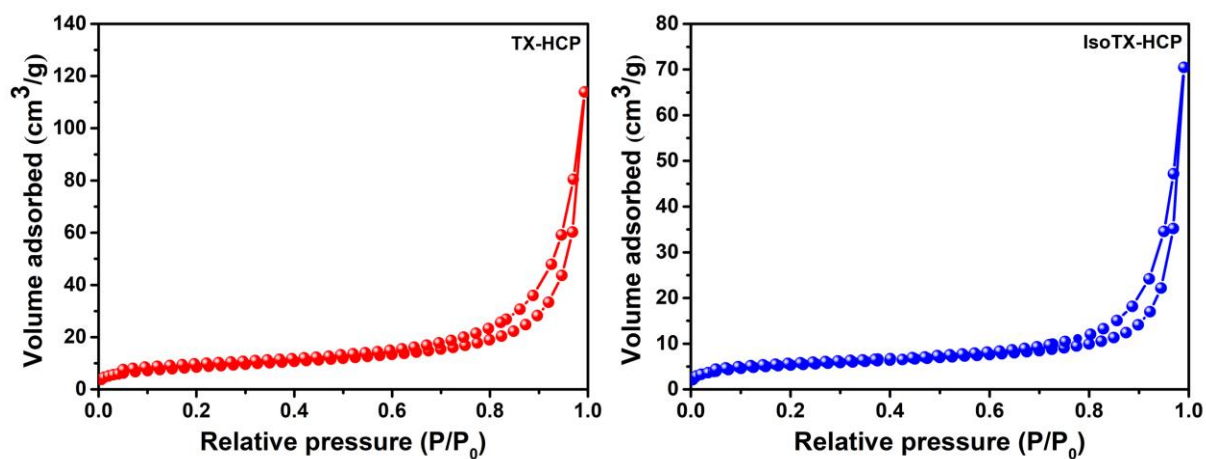

Fig. S6  $N_2$ -physorption isotherms of TX-HCP and IsoTX-HCP.



| Surface Area                                                                                         |                             | Surface Area                                                                                         |                             |
|------------------------------------------------------------------------------------------------------|-----------------------------|------------------------------------------------------------------------------------------------------|-----------------------------|
| Single point surface area at P/Po = 0.275377484:                                                     | 29.5149 m <sup>2</sup> /g   | Single point surface area at P/Po = 0.275318302:                                                     | 18.2551 m <sup>2</sup> /g   |
| BET Surface Area:                                                                                    | 30.4645 m <sup>2</sup> /g   | BET Surface Area:                                                                                    | 18.9440 m <sup>2</sup> /g   |
| t-Plot Micropore Area:                                                                               | 2.0644 m <sup>2</sup> /g    | t-Plot Micropore Area:                                                                               | 1.0108 m <sup>2</sup> /g    |
| t-Plot external surface area:                                                                        | 28.4001 m <sup>2</sup> /g   | t-Plot external surface area:                                                                        | 17.9332 m <sup>2</sup> /g   |
| BJH Adsorption cumulative surface area of pores between 1.7000 nm and 300.0000 nm width:             | 26.3864 m <sup>2</sup> /g   | BJH Adsorption cumulative surface area of pores between 1.7000 nm and 300.0000 nm width:             | 15.3302 m <sup>2</sup> /g   |
| BJH Desorption cumulative surface area of pores between 1.7000 nm and 300.0000 nm width:             | 27.9582 m <sup>2</sup> /g   | BJH Desorption cumulative surface area of pores between 1.7000 nm and 300.0000 nm width:             | 16.5308 m <sup>2</sup> /g   |
| Pore Volume                                                                                          |                             | Pore Volume                                                                                          |                             |
| Single point adsorption total pore volume of pores less than 40.3122 nm width at P/Po = 0.950000000: | 0.069185 cm <sup>3</sup> /g | Single point adsorption total pore volume of pores less than 40.3122 nm width at P/Po = 0.950000000: | 0.034660 cm <sup>3</sup> /g |
| Single point desorption total pore volume of pores less than 40.3122 nm width at P/Po = 0.950000000: | 0.095121 cm <sup>3</sup> /g | Single point desorption total pore volume of pores less than 40.3122 nm width at P/Po = 0.950000000: | 0.050281 cm <sup>3</sup> /g |
| t-Plot micropore volume:                                                                             | 0.000738 cm <sup>3</sup> /g | t-Plot micropore volume:                                                                             | 0.000297 cm <sup>3</sup> /g |
| BJH Adsorption cumulative volume of pores between 1.7000 nm and 300.0000 nm width:                   | 0.174019 cm <sup>3</sup> /g | BJH Adsorption cumulative volume of pores between 1.7000 nm and 300.0000 nm width:                   | 0.096323 cm <sup>3</sup> /g |
| BJH Desorption cumulative volume of pores between 1.7000 nm and 300.0000 nm width:                   | 0.172807 cm <sup>3</sup> /g | BJH Desorption cumulative volume of pores between 1.7000 nm and 300.0000 nm width:                   | 0.096639 cm <sup>3</sup> /g |
| Pore Size                                                                                            |                             | Pore Size                                                                                            |                             |
| Adsorption average pore diameter (4V/A by BET):                                                      | 9.0840 nm                   | Adsorption average pore diameter (4V/A by BET):                                                      | 7.3183 nm                   |
| Desorption average pore diameter (4V/A by BET):                                                      | 12.4894 nm                  | Desorption average pore diameter (4V/A by BET):                                                      | 10.6168 nm                  |
| BJH Adsorption average pore width (4V/A):                                                            | 26.3801 nm                  | BJH Adsorption average pore width (4V/A):                                                            | 25.1329 nm                  |
| BJH Desorption average pore width (4V/A):                                                            | 24.7236 nm                  | BJH Desorption average pore width (4V/A):                                                            | 23.3840 nm                  |

**Fig. S7** Pore properties of TX-HCP (left) and IsoTX-HCP (right).

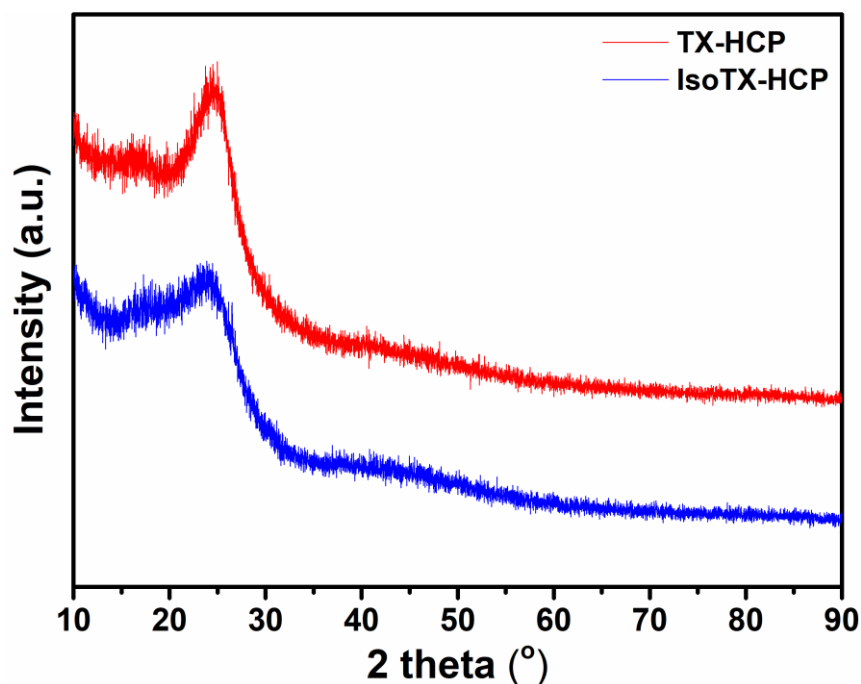

**Fig. S8** PXRD patterns of TX-HCP and IsoTX-HCP.

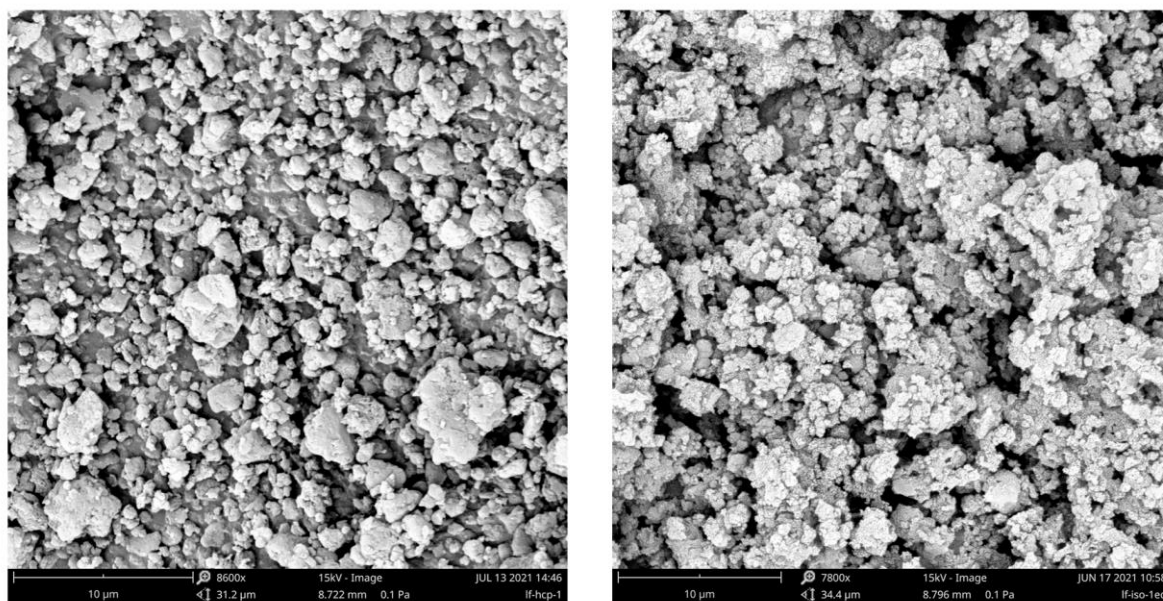

**Fig. S9** SEM images of TX-HCP and IsoTX-HCP.

#### 4. General Procedure for Visible-Light-Induced C-C Bond Formations

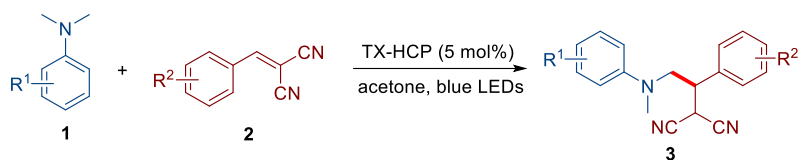

To a Schlenk tube were added the substrates **1** (0.3 mmol, 1.5 equiv), **2** (0.2 mmol, 1.0 equiv), TX-HCP (5 mol%), and acetone (1 mL). The reaction mixture was degassed via freeze-pump-thaw for 3 cycles. After the mixture was thoroughly degassed, the vial was sealed and positioned approximately 2~3 cm from a 30 W blue LEDs lamp. The mixture was stirred at room temperature for the indicated time (monitored by TLC) under nitrogen atmosphere. Afterwards, the catalyst was separated by filtration and washed with dichloromethane. Then the filtrate was concentrated by rotary evaporation and the residue was purified by silica gel flash column chromatography using ethyl acetate/petroleum ether as the eluent to afford the desired products **3**. The analytical data of the products are summarized below.

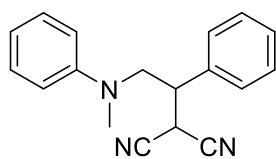

**3a**,<sup>[3]</sup> yellow oil, 50.3 mg, 93% yield. <sup>1</sup>H NMR (400 MHz, CDCl<sub>3</sub>) δ 7.45-7.39 (m, 5H), 7.32-7.28 (m, 2H), 6.88-6.80 (m, 3H), 4.23 (d, *J* = 4.4 Hz, 1H), 3.93-3.87 (m, 1H), 3.73-3.68 (m, 1H), 3.65-3.60 (m, 1H), 2.97 (s, 3H).

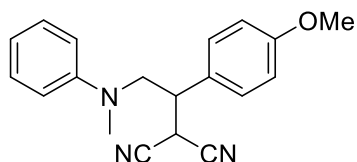

**3b**,<sup>[4]</sup> yellow oil, 51.4 mg, 87% yield. <sup>1</sup>H NMR (400 MHz, CDCl<sub>3</sub>) δ 7.33-7.28 (m, 4H), 6.97 (d, *J* = 8.8 Hz, 2H), 6.86 (t, *J* = 7.6 Hz, 1H), 6.81 (d, *J* = 8.0 Hz, 2H), 4.19 (d, *J* = 4.4 Hz, 1H), 3.90-3.85 (m, 1H), 3.82 (s, 3H), 3.68-3.63(m, 1H), 3.60-3.55 (m, 1H), 2.96 (s, 3H).

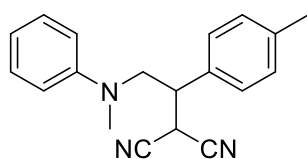

**3c**,<sup>[4]</sup> yellow oil, 49.5 mg, 76% yield. <sup>1</sup>H NMR (400 MHz, CDCl<sub>3</sub>) δ 7.31-7.23 (m, 6H), 6.86-6.79 (m, 3H), 4.19 (d, *J* = 4.4 Hz, 1H), 3.90-3.84 (m, 1H), 3.69-3.64 (m, 1H), 3.61-3.56 (m, 1H), 2.96 (s, 3H), 2.38 (s, 3H).

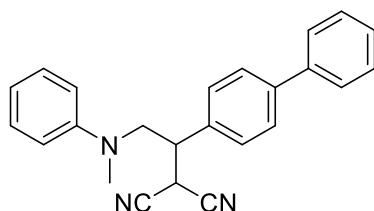

**3d**, white oil, 92.0 mg, 87% yield. <sup>1</sup>H NMR (400 MHz, CDCl<sub>3</sub>) δ 7.64 (d, *J* = 8.4 Hz, 2H), 7.59 (d, *J* = 7.2 Hz, 2H), 7.46-7.42 (m, 4H), 7.37 (t, *J* = 7.2 Hz, 1H), 7.31-7.27 (m, 2H), 6.86-6.79 (m, 3H), 4.20 (d, *J* = 4.4 Hz, 1H), 3.92-3.86 (m, 1H), 3.72-3.63 (m, 2H), 2.95 (s, 3H). <sup>13</sup>C NMR (100 MHz, CDCl<sub>3</sub>) δ 148.4, 142.1, 139.9, 133.7, 129.5, 128.8, 128.5, 127.9, 127.7, 127.0, 118.6, 113.7, 112.2, 111.8, 55.2, 44.3, 40.7, 26.9. IR (thin film): ν<sub>max</sub> (cm<sup>-1</sup>) = 3662, 2988, 2901, 1599, 1505, 1450, 1412, 1343, 1242, 1066, 1008, 993, 908, 839, 752, 733, 695, 669. HRMS (ESI) calcd for C<sub>24</sub>H<sub>20</sub>N<sub>3</sub> [M-H]<sup>-</sup>: 350.1663. Found: 350.1660.

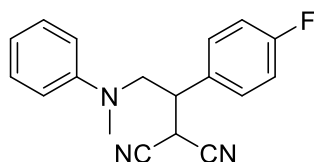

**3e**,<sup>[4]</sup> white oil, 53.0 mg, 91% yield. <sup>1</sup>H NMR (400 MHz, CDCl<sub>3</sub>) δ 7.40-7.37 (m, 2H), 7.32-7.28 (m, 2H), 7.16 (t, *J* = 8.4 Hz, 2H), 6.88 (t, *J* = 7.2 Hz, 1H), 6.81 (d, *J* = 8.0 Hz, 2H), 4.22 (d, *J* = 4.4 Hz, 1H), 3.88-3.82 (m, 1H), 3.69-3.59 (m, 2H), 2.96 (s, 3H).

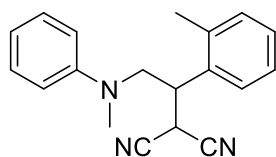

**3f**, white oil, 82.6 mg, 93% yield. <sup>1</sup>H NMR (400 MHz, CDCl<sub>3</sub>) δ 7.45 (d, *J* = 7.2 Hz, 1H), 7.30-7.22 (m, 5H), 6.84 (t, *J* = 7.2 Hz, 1H), 6.76 (d, *J* = 8.0 Hz, 2H), 4.07 (d, *J* = 6.0 Hz, 1H), 4.02-3.97 (m, 1H), 3.94-3.88 (m, 1H), 3.64-3.59 (m, 1H), 2.88 (s, 3H), 2.28 (s, 3H). <sup>13</sup>C NMR (100 MHz, CDCl<sub>3</sub>) δ 148.2, 137.0, 133.8, 131.4, 129.5, 128.7, 127.0, 126.0, 118.3, 113.3, 112.1, 111.9, 55.7, 40.7, 38.9, 26.4, 19.6. IR (thin film): ν<sub>max</sub> (cm<sup>-1</sup>) = 1598, 1505, 1463, 1342, 1286, 1244, 1194, 1121, 1034, 993, 942, 910, 753, 728, 695. HRMS (ESI) calcd for C<sub>19</sub>H<sub>18</sub>N<sub>3</sub> [M-H]<sup>-</sup>: 288.1506. Found: 288.1501.

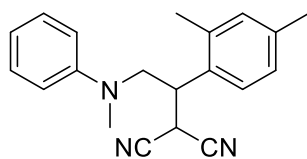

**3g**, yellow oil, 80.6 mg, 89% yield. <sup>1</sup>H NMR (400 MHz, CDCl<sub>3</sub>) δ 7.35 (d, *J* = 8.0 Hz, 1H), 7.30 (t, *J* = 7.2 Hz, 2H), 7.12 (d, *J* = 8.4 Hz, 1H), 7.06 (s, 1H), 6.84 (t, *J* = 7.2 Hz, 1H), 6.77 (d, *J* = 8.8 Hz, 2H), 4.07 (d, *J* = 5.6 Hz, 1H), 3.96-3.87 (m, 2H), 3.63-3.58 (m, 1H), 2.90 (s, 3H), 2.32 (s, 3H), 2.26 (s, 3H). <sup>13</sup>C NMR (100 MHz, CDCl<sub>3</sub>) δ 148.2, 138.5, 136.7, 132.2, 130.7, 129.5, 127.7, 125.9, 118.3, 113.3, 112.2, 112.0, 55.8, 40.8, 38.7, 26.6, 21.0, 19.6. IR

(thin film):  $\nu_{\text{max}}$  ( $\text{cm}^{-1}$ ) = 2971, 2901, 1599, 1505, 1076, 1066, 1048, 1037, 993, 750, 734, 693, 669, 514, 452, 412. HRMS (ESI) calcd for  $\text{C}_{20}\text{H}_{20}\text{N}_3$   $[\text{M}-\text{H}]^-$ : 302.1663. Found: 302.1661.

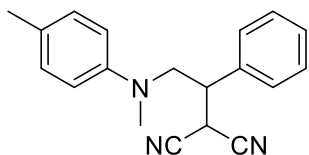

**3h**,<sup>[3]</sup> yellow oil, 40.4 mg, 70% yield.  $^1\text{H}$  NMR (400 MHz,  $\text{CDCl}_3$ )  $\delta$  7.45-7.39 (m, 5H), 7.13 (d,  $J = 8.4$  Hz, 2H), 6.77 (d,  $J = 8.8$  Hz, 2H), 4.30 (d,  $J = 4.4$  Hz, 1H), 3.85-3.79 (m, 1H), 3.66-3.58 (m, 2H), 2.94 (s, 3H), 2.29 (s, 3H).

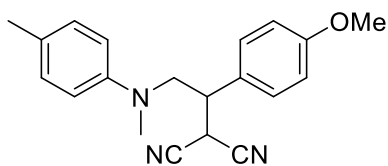

**3i**,<sup>[3]</sup> yellow oil, 49.9 mg, 80% yield.  $^1\text{H}$  NMR (400 MHz,  $\text{CDCl}_3$ )  $\delta$  7.33 (d,  $J = 8.4$  Hz, 2H), 7.12 (d,  $J = 8.0$  Hz, 2H), 6.97 (d,  $J = 8.8$  Hz, 2H), 6.75 (d,  $J = 8.4$  Hz, 2H), 4.25 (d,  $J = 4.0$  Hz, 1H), 3.82 (s, 3H), 3.77-3.75 (m, 1H), 3.61-3.57 (m, 2H), 2.93 (s, 3H), 2.28 (s, 3H).

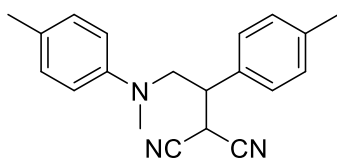

**3j**,<sup>[3]</sup> yellow oil, 53.3 mg, 90% yield.  $^1\text{H}$  NMR (400 MHz,  $\text{CDCl}_3$ )  $\delta$  7.29 (d,  $J = 8.4$  Hz, 2H), 7.25 (d,  $J = 5.2$  Hz, 2H), 7.12 (d,  $J = 8.4$  Hz, 2H), 6.75 (d,  $J = 8.8$  Hz, 2H), 4.25 (d,  $J = 4.4$  Hz, 1H), 3.82-3.76 (m, 1H), 3.62-3.54 (m, 2H), 2.93 (s, 3H), 2.37 (s, 3H), 2.28 (s, 3H).

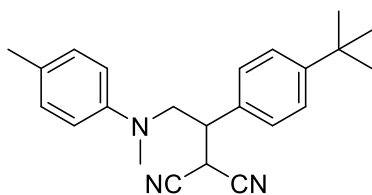

**3k**,<sup>[3]</sup> yellow oil, 52.6 mg, 75% yield. <sup>1</sup>H NMR (400 MHz, CDCl<sub>3</sub>) δ 7.45 (d, *J* = 8.4 Hz, 2H), 7.33 (d, *J* = 8.4 Hz, 2H), 7.11 (d, *J* = 8.4 Hz, 2H), 6.76 (d, *J* = 8.4 Hz, 2H), 4.27 (d, *J* = 4.4 Hz, 1H), 3.82-3.76 (m, 1H), 3.64-3.55 (m, 2H), 2.94 (s, 3H), 2.28 (s, 3H), 1.33 (s, 9H).

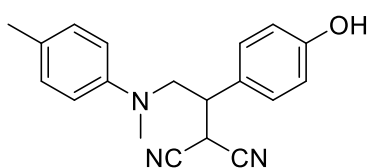

**3l**, yellow oil, 55.6 mg, 60% yield. <sup>1</sup>H NMR (400 MHz, CDCl<sub>3</sub>) δ 7.27 (d, *J* = 8.4 Hz, 2H), 7.12 (d, *J* = 8.4 Hz, 2H), 6.87 (d, *J* = 8.8 Hz, 2H), 6.76 (d, *J* = 8.4 Hz, 2H), 5.65 (s, 1H), 4.27 (d, *J* = 4.4 Hz, 1H), 3.79-3.73 (m, 1H), 3.61-3.53 (m, 2H), 2.93 (s, 3H), 2.28 (s, 3H). <sup>13</sup>C NMR (100 MHz, CDCl<sub>3</sub>) δ 156.5, 146.6, 130.1, 129.5, 128.6, 126.6, 116.2, 114.7, 112.4, 111.8, 55.6, 44.2, 41.3, 27.2, 20.3. IR (thin film): ν<sub>max</sub> (cm<sup>-1</sup>) = 1614, 1515, 1446, 1351, 1266, 1212, 1191, 1177, 1121, 909, 832, 804, 730, 538, 518. HRMS (ESI) calcd for C<sub>19</sub>H<sub>18</sub>N<sub>3</sub>O [M-H]<sup>-</sup>: 304.1455. Found: 304.1448.

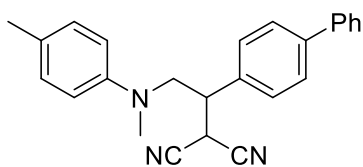

**3m**,<sup>[3]</sup> yellow oil, 54.7 mg, 75% yield. <sup>1</sup>H NMR (400 MHz, CDCl<sub>3</sub>) δ 7.67 (d, *J* = 8.4 Hz, 2H), 7.61 (d, *J* = 7.2 Hz, 2H), 7.48-7.44 (m, 4H), 7.39 (t, *J* = 7.2 Hz, 1H), 7.13 (d, *J* = 8.0 Hz, 2H), 6.78 (d, *J* = 8.8 Hz, 2H), 4.33 (d, *J* = 4.4 Hz, 1H), 3.87-3.81 (m, 1H), 3.70-3.63 (m, 2H), 2.97 (s, 3H), 2.29 (s, 3H).

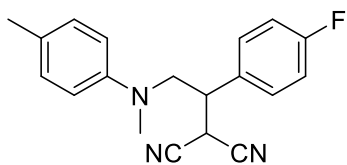

**3n**,<sup>[3]</sup> yellow oil, 44.7 mg, 77% yield. <sup>1</sup>H NMR (400 MHz, CDCl<sub>3</sub>) δ 7.40-7.37 (m, 2H), 7.16-7.10 (m, 4H), 6.75 (d, *J* = 8.8 Hz, 2H), 4.28 (d, *J* = 4.0 Hz, 1H), 3.80-3.74 (m, 1H), 3.62-3.55 (m, 2H), 2.94 (s, 3H), 2.29 (s, 3H).

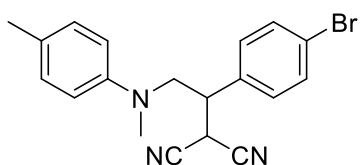

**3o**,<sup>[3]</sup> yellow oil, 52.5 mg, 68% yield. <sup>1</sup>H NMR (400 MHz, CDCl<sub>3</sub>) δ 7.59 (d, *J* = 8.4 Hz, 2H), 7.29 (d, *J* = 8.4 Hz, 2H), 7.13 (d, *J* = 8.8 Hz, 2H), 6.75 (d, *J* = 8.8 Hz, 2H), 4.29 (d, *J* = 4.4 Hz, 1H), 3.80-3.73 (m, 1H), 3.62-3.54 (m, 2H), 2.93 (s, 3H), 2.29 (s, 3H).

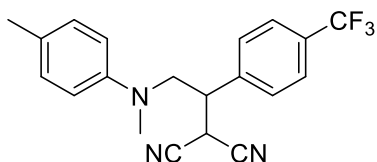

**3p**,<sup>[3]</sup> yellow oil, 45.5 mg, 64% yield. <sup>1</sup>H NMR (400 MHz, CDCl<sub>3</sub>) δ 7.73 (d, *J* = 8.4 Hz, 2H), 7.55 (d, *J* = 8.0 Hz, 2H), 7.13 (d, *J* = 8.4 Hz, 2H), 6.76 (d, *J* = 8.4 Hz, 2H), 4.35 (d, *J* = 4.4 Hz, 1H), 3.84-3.78 (m, 1H), 3.66-3.63 (m, 2H), 2.95 (s, 3H), 2.29 (s, 3H).

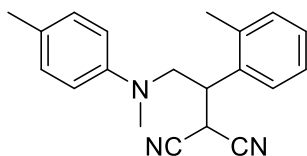

**3q**,<sup>[3]</sup> yellow oil, 53.2 mg, 87% yield. <sup>1</sup>H NMR (400 MHz, CDCl<sub>3</sub>) δ 7.47 (d, *J* = 6.8 Hz, 1H), 7.32-7.24 (m, 3H), 7.12 (d, *J* = 8.8 Hz, 2H), 6.72 (d, *J* = 8.4 Hz, 2H), 4.16 (d, *J* = 5.6 Hz, 1H),



4.01-3.96 (m, 1H), 3.86-3.80 (m, 1H), 3.60-3.55 (m, 1H), 2.90 (s, 3H), 2.32 (s, 3H), 2.28 (s, 3H).

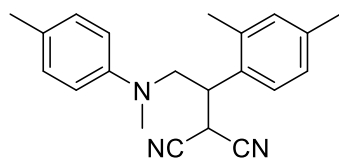

**3r**, yellow oil, 72.5 mg, 75% yield.  $^1\text{H}$  NMR (400 MHz,  $\text{CDCl}_3$ )  $\delta$  7.35 (d,  $J = 8.0$  Hz, 1H), 7.11 (d,  $J = 8.8$  Hz, 3H), 7.06 (s, 1H), 6.72 (d,  $J = 8.8$  Hz, 2H), 4.12 (d,  $J = 5.6$  Hz, 1H), 3.95-3.92 (m, 1H), 3.84-3.77(m, 1H), 3.57-3.52 (m, 1H), 2.89 (s, 3H), 2.32 (s, 3H), 2.28 (d,  $J = 2.4$  Hz, 6H).  $^{13}\text{C}$  NMR (100 MHz,  $\text{CDCl}_3$ )  $\delta$  146.3, 138.5, 136.7, 132.1, 130.8, 130.0, 128.0, 127.7, 126.0, 114.1, 112.3, 112.1, 56.0, 41.3, 38.8, 26.5, 21.0, 20.2, 19.6. IR (thin film):  $\nu_{\text{max}}$  ( $\text{cm}^{-1}$ ) = 2971, 2901, 1519, 1450, 1407, 1394, 1379, 1343, 1241, 1191, 1066, 1057, 909, 805, 733. HRMS (ESI) calcd for  $\text{C}_{21}\text{H}_{22}\text{N}_3$   $[\text{M}-\text{H}]^-$ : 316.1819. Found: 316.1810.

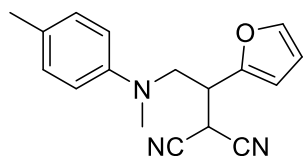

**3s**, yellow oil, 46.3 mg, 55% yield.  $^1\text{H}$  NMR (400 MHz,  $\text{CDCl}_3$ )  $\delta$  7.48 (s, 1H), 7.11 (d,  $J = 8.0$  Hz, 2H), 6.73 (d,  $J = 8.4$  Hz, 2H), 6.43-6.41 (m, 2H), 4.21 (d,  $J = 4.4$  Hz, 1H), 3.79-3.69 (m, 3H), 2.90 (s, 3H), 2.27 (s, 3H).  $^{13}\text{C}$  NMR (100 MHz,  $\text{CDCl}_3$ )  $\delta$  148.2, 146.2, 143.4, 130.1, 128.4, 114.3, 111.9, 111.3, 110.8, 109.6, 53.9, 40.8, 39.0, 25.2, 20.2. IR (thin film):  $\nu_{\text{max}}$  ( $\text{cm}^{-1}$ ) = 2878, 1615, 1519, 1328, 1190, 1148, 1118, 1074, 1014, 910, 885, 806, 743, 598. HRMS (ESI) calcd for  $\text{C}_{17}\text{H}_{16}\text{N}_3\text{O}$   $[\text{M}-\text{H}]^-$ : 278.1299. Found: 278.1291.

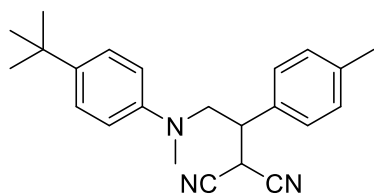

**3t**,<sup>[3]</sup> yellow oil, 58.0 mg, 86% yield. <sup>1</sup>H NMR (400 MHz, CDCl<sub>3</sub>) δ 7.34-7.29 (m, 4H), 7.25 (d, *J* = 8.8 Hz, 2H), 6.79 (d, *J* = 8.8 Hz, 2H), 4.27 (d, *J* = 4.0 Hz, 1H), 3.84-3.77 (m, 1H), 3.65-3.56 (m, 2H), 2.96 (s, 3H), 2.38 (s, 3H), 1.30 (s, 9H).

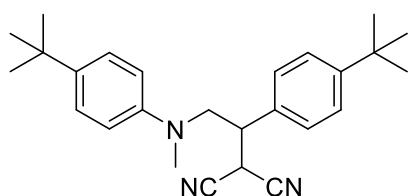

**3u**,<sup>[3]</sup> yellow oil, 58.7 mg, 76% yield. <sup>1</sup>H NMR (400 MHz, CDCl<sub>3</sub>) δ 7.46 (d, *J* = 8.4 Hz, 2H), 7.35-7.32 (m, 4H), 6.79 (d, *J* = 9.2 Hz, 2H), 4.30 (d, *J* = 4.0 Hz, 1H), 3.84-3.77 (m, 1H), 3.67-3.58 (m, 2H), 2.98 (s, 3H), 1.34 (s, 9H), 1.31 (s, 9H).

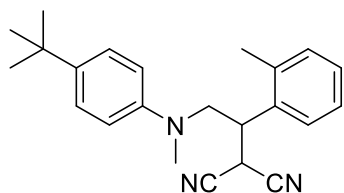

**3v**,<sup>[3]</sup> yellow oil, 51.4 mg, 74% yield. <sup>1</sup>H NMR (400 MHz, CDCl<sub>3</sub>) δ 7.49 (d, *J* = 7.2 Hz, 1H), 7.33-7.22 (m, 5H), 6.76 (d, *J* = 9.2 Hz, 2H), 4.19 (d, *J* = 5.6 Hz, 1H), 4.04-3.99 (m, 1H), 3.86-3.80 (m, 1H), 3.62-3.57 (m, 1H), 2.92 (s, 3H), 2.35 (s, 3H), 1.30 (s, 9H).

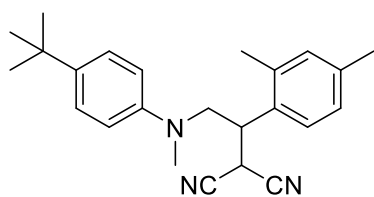

**3w**,<sup>[3]</sup> yellow oil, 54.7 mg, 77% yield. <sup>1</sup>H NMR (400 MHz, CDCl<sub>3</sub>) δ 7.38 (d, *J* = 8.0 Hz, 1H),

7.33 (d,  $J = 9.2$  Hz, 2H), 7.12 (d,  $J = 8.0$  Hz, 1H), 7.08 (s, 1H), 6.76 (d,  $J = 9.2$  Hz, 2H), 4.18 (d,  $J = 5.6$  Hz, 1H), 4.00-3.95 (m, 1H), 3.84-3.78 (m, 1H), 3.60-3.55 (m, 1H), 2.94 (s, 3H), 2.33 (s, 3H), 2.32 (s, 3H), 1.30 (s, 9H).

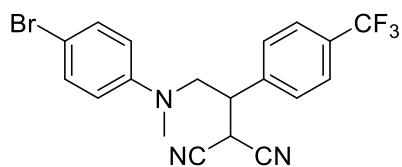

**3x**,<sup>[3]</sup> white oil, 59.3 mg, 71% yield.  $^1\text{H}$  NMR (400 MHz,  $\text{CDCl}_3$ )  $\delta$  7.73 (d,  $J = 8.8$  Hz, 2H), 7.53 (d,  $J = 8.0$  Hz, 2H), 7.39 (d,  $J = 9.2$  Hz, 2H), 6.66 (d,  $J = 9.2$  Hz, 2H), 4.21 (d,  $J = 4.8$  Hz, 1H), 3.94-3.87 (m, 1H), 3.71-3.64 (m, 2H), 2.93 (s, 3H).

## 5. Recyclability tests of TX-HCP

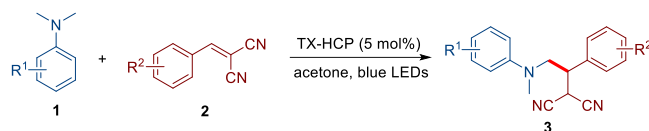

| cycle | results                     |
|-------|-----------------------------|
| 1     | <b>3q</b> , 86% yield, 48 h |
| 2     | <b>3q</b> , 86% yield, 48 h |
| 3     | <b>3q</b> , 83% yield, 48 h |
| 4     | <b>3q</b> , 84% yield, 64 h |
| 5     | <b>3q</b> , 84% yield, 72 h |

| cycle | results                     |
|-------|-----------------------------|
| 1     | <b>3q</b> , 86% yield, 48 h |
| 2     | <b>3j</b> , 90% yield, 48 h |
| 3     | <b>3i</b> , 78% yield, 48 h |
| 4     | <b>3g</b> , 87% yield, 64 h |
| 5     | <b>3d</b> , 85% yield, 72 h |

## 6. References

1. L. Wang, Y. Zhang, H. Jiang and H. Wang, *Ind. Eng. Chem. Res.*, 2020, **59**, 15955-15966.
2. M. Tajbakhsh, R. Hosseinzadeh, H. Alinezhad, S. Ghahari, A. Heydari and S. Khaksarc, *Synthesis*, 2011, **3**, 490-496.
3. S. Zhu, A. Das, L. Bui, H. Zhou, D. P. Curran and M. Rueping, *J. Am. Chem. Soc.*, 2013, **135**, 1823-1829.
4. Y. Cai, Y. Tang, L. Fan, Q. Lefebvre, H. Hou and M. Rueping, *ACS Catal.*, 2018, **8**, 9471-9476.

## 7. Copies of NMR spectra

<sup>1</sup>H NMR Spectrum of **3a**

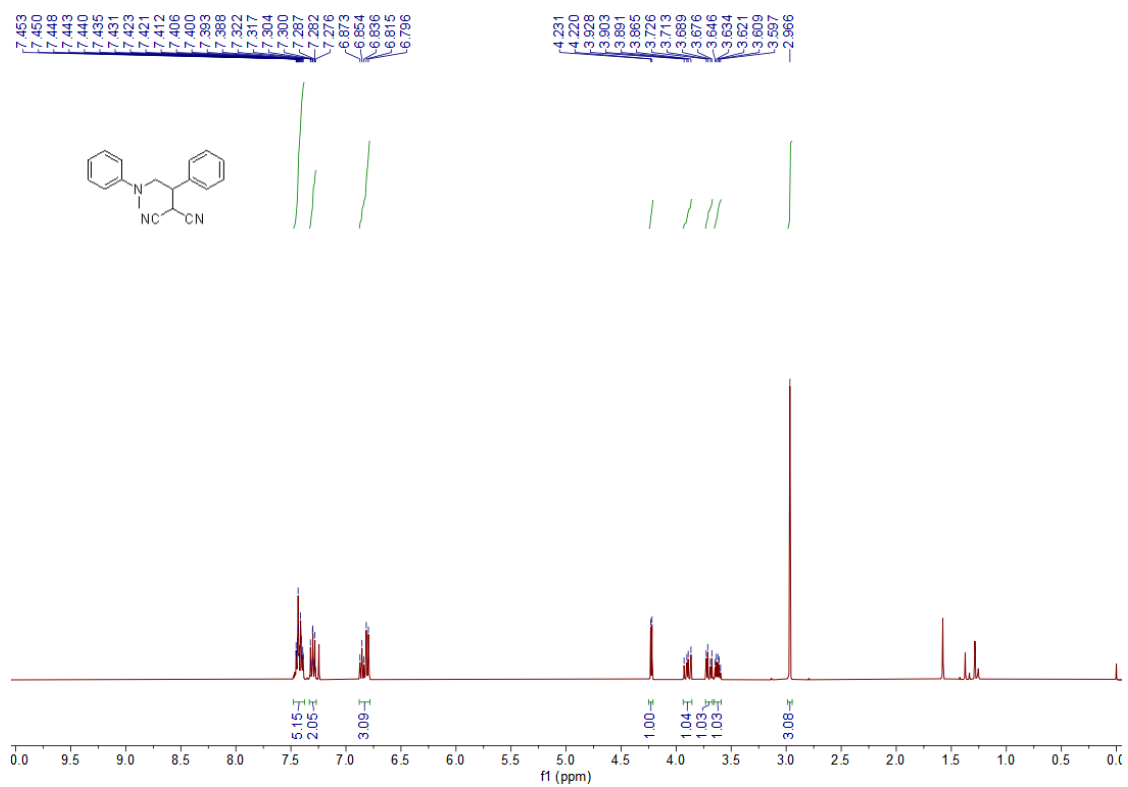

<sup>1</sup>H NMR Spectrum of **3b**

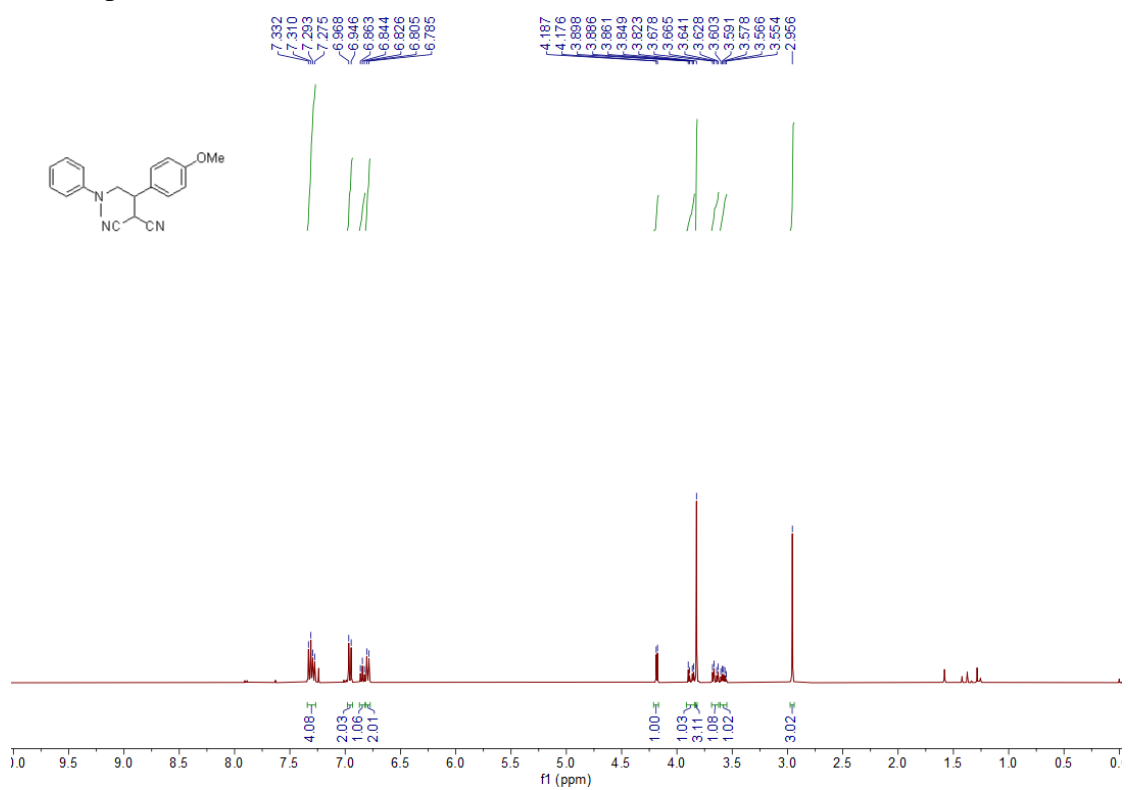

### <sup>1</sup>H NMR Spectrum of **3c**

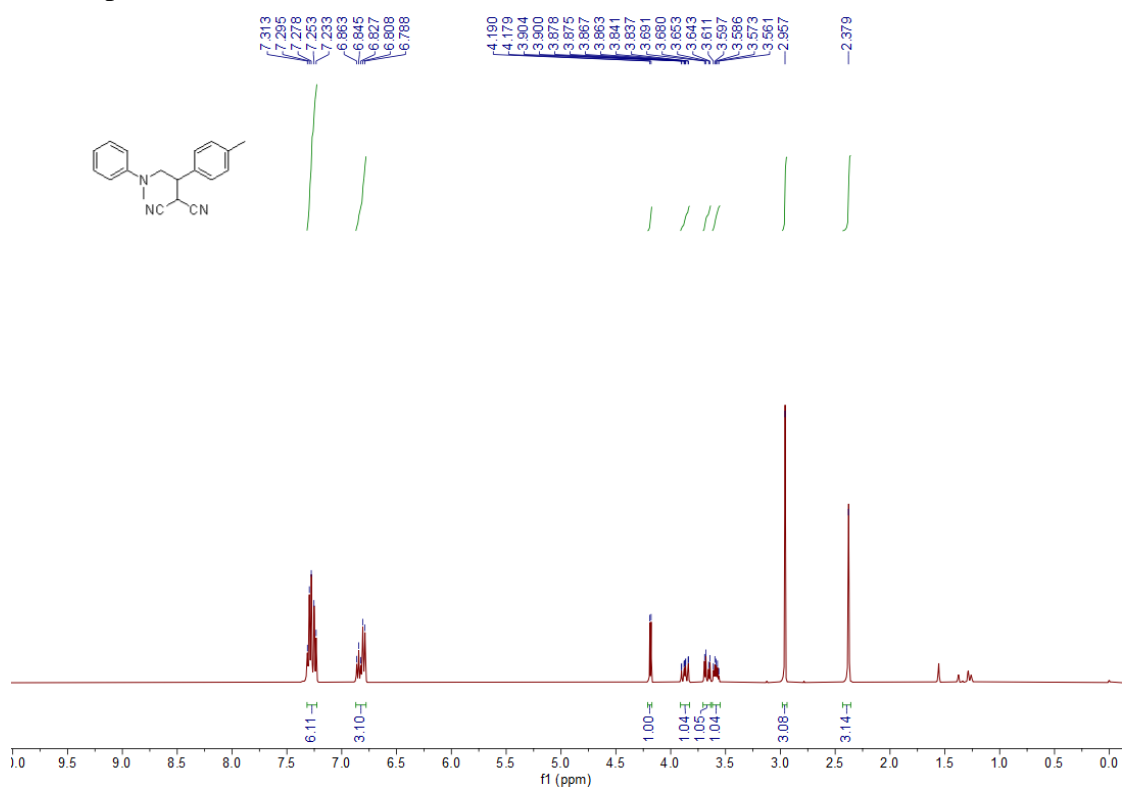

### <sup>1</sup>H NMR Spectrum of **3d**

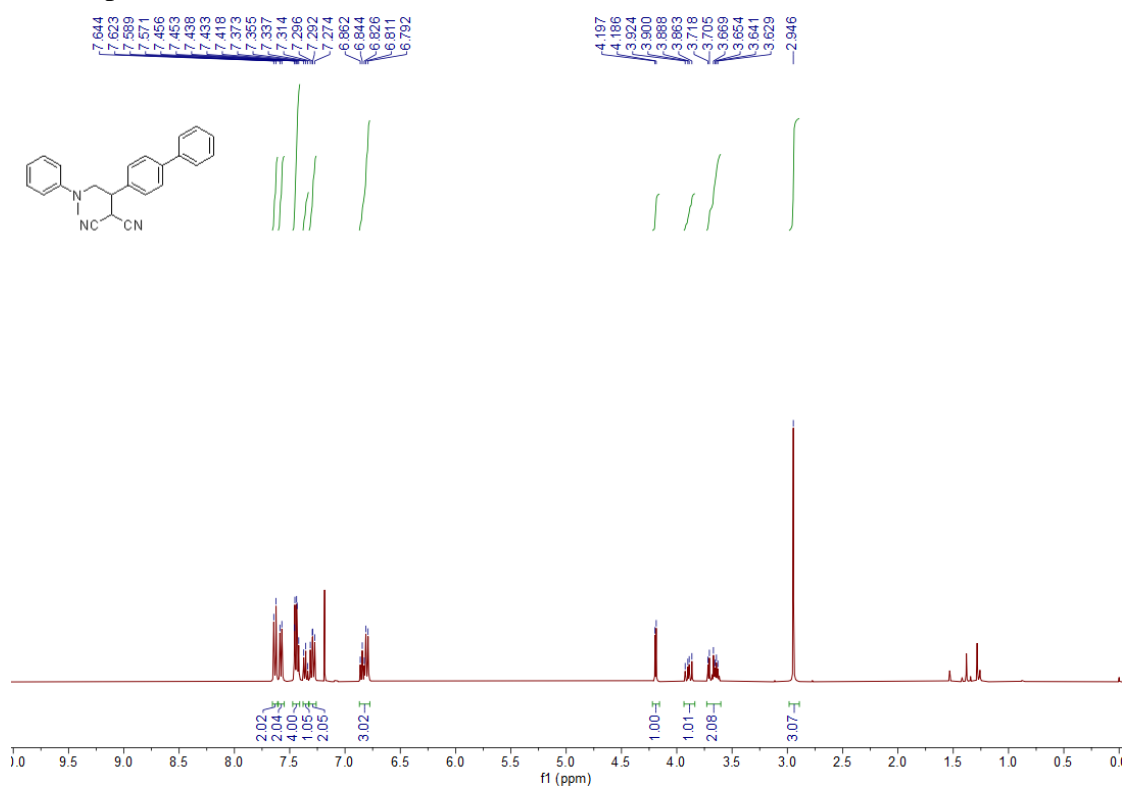

### <sup>13</sup>C NMR Spectrum of **3d**

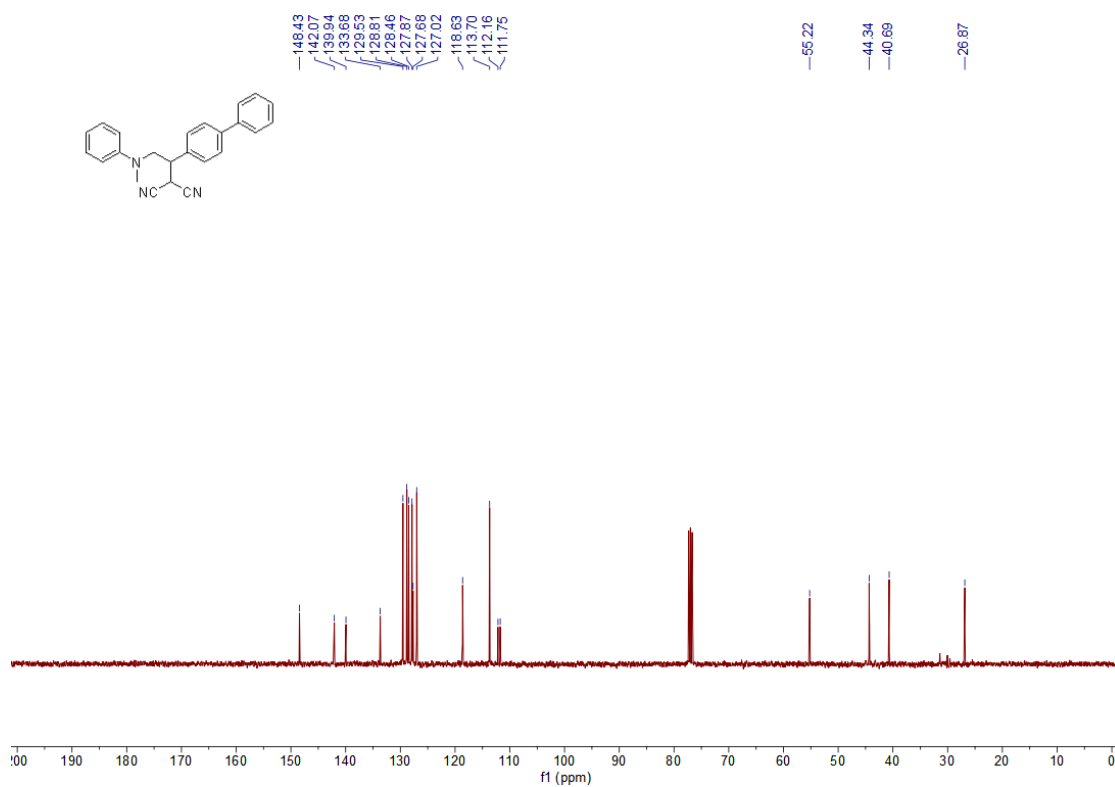

### <sup>1</sup>H NMR Spectrum of **3e**

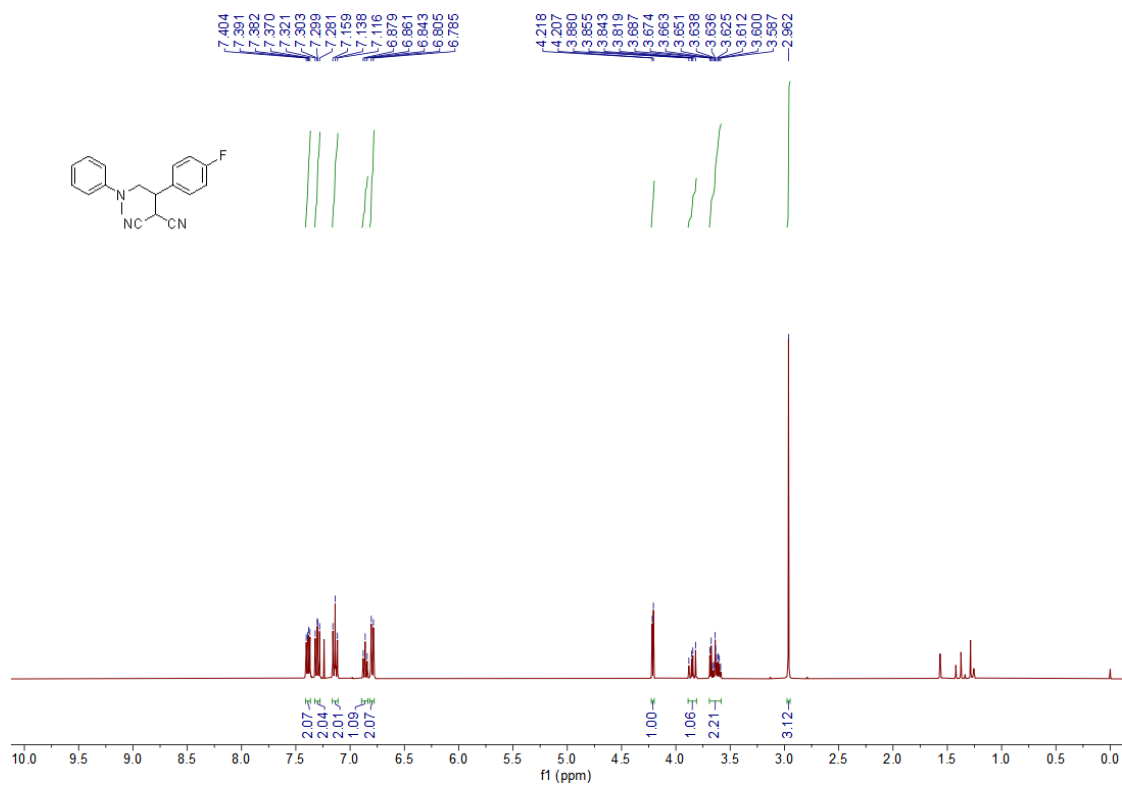



### <sup>1</sup>H NMR Spectrum of **3f**

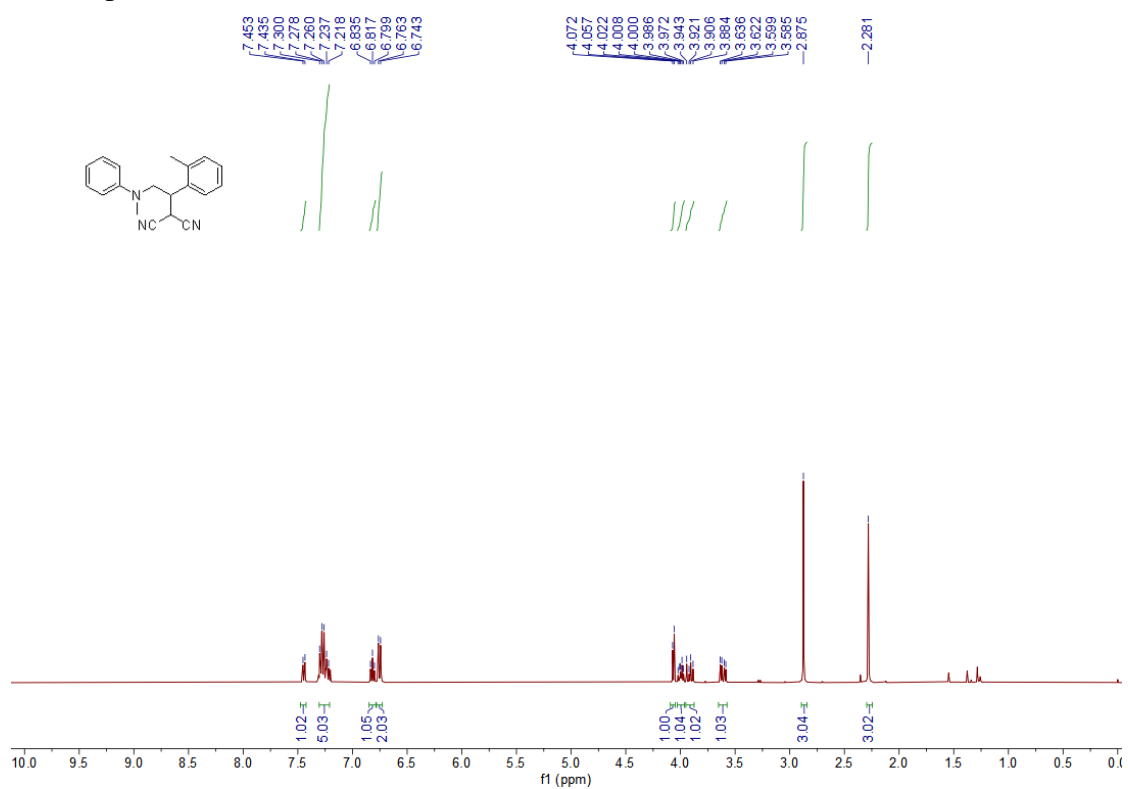

### <sup>13</sup>C NMR Spectrum of **3f**

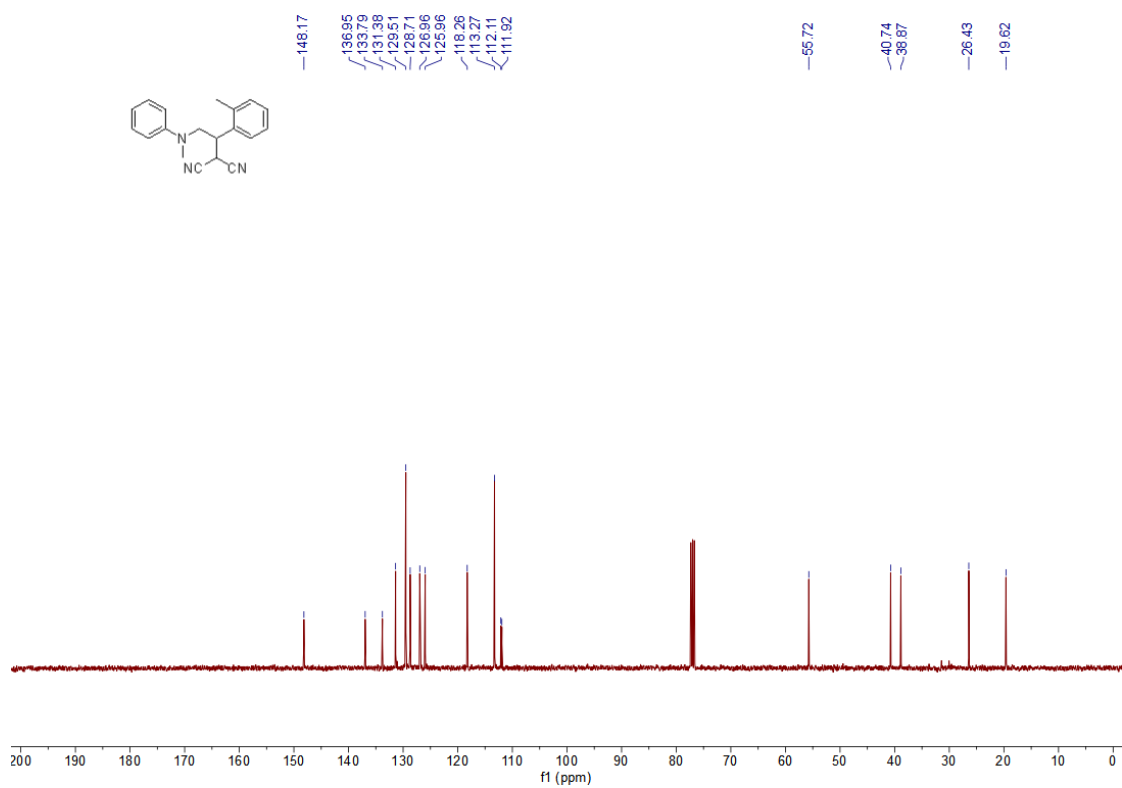

### <sup>1</sup>H NMR Spectrum of **3g**

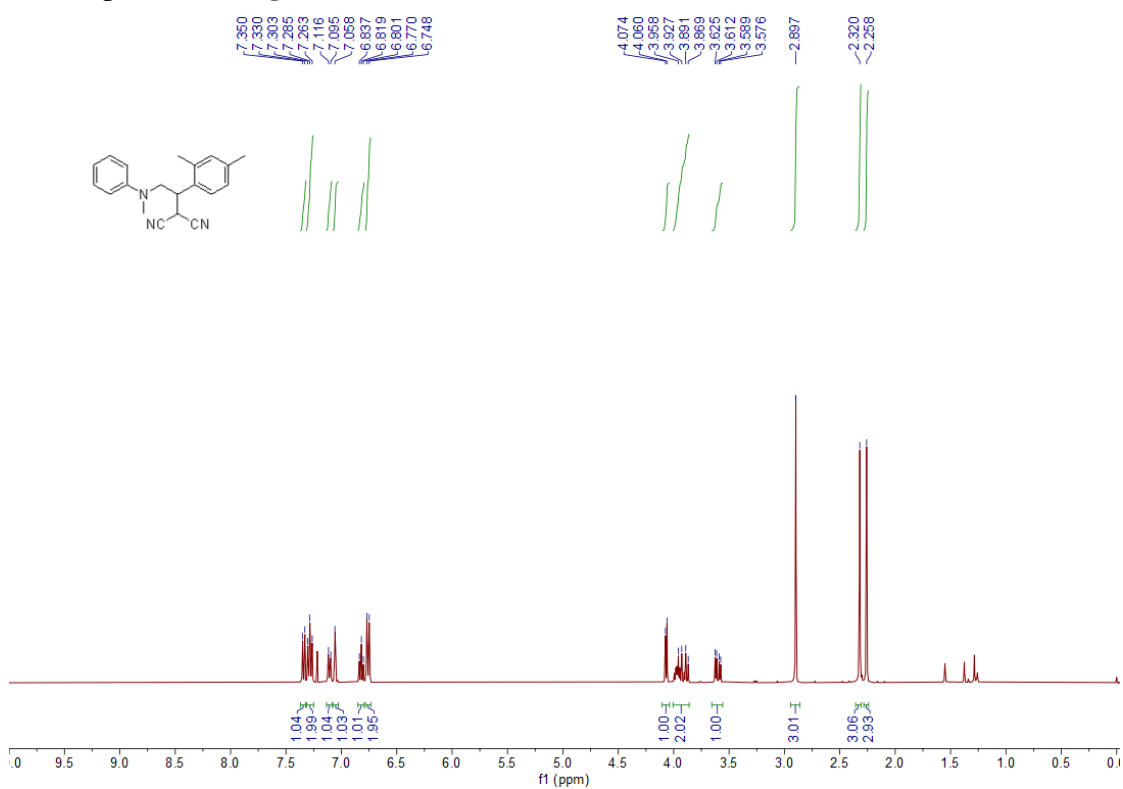

### <sup>13</sup>C NMR Spectrum of **3g**

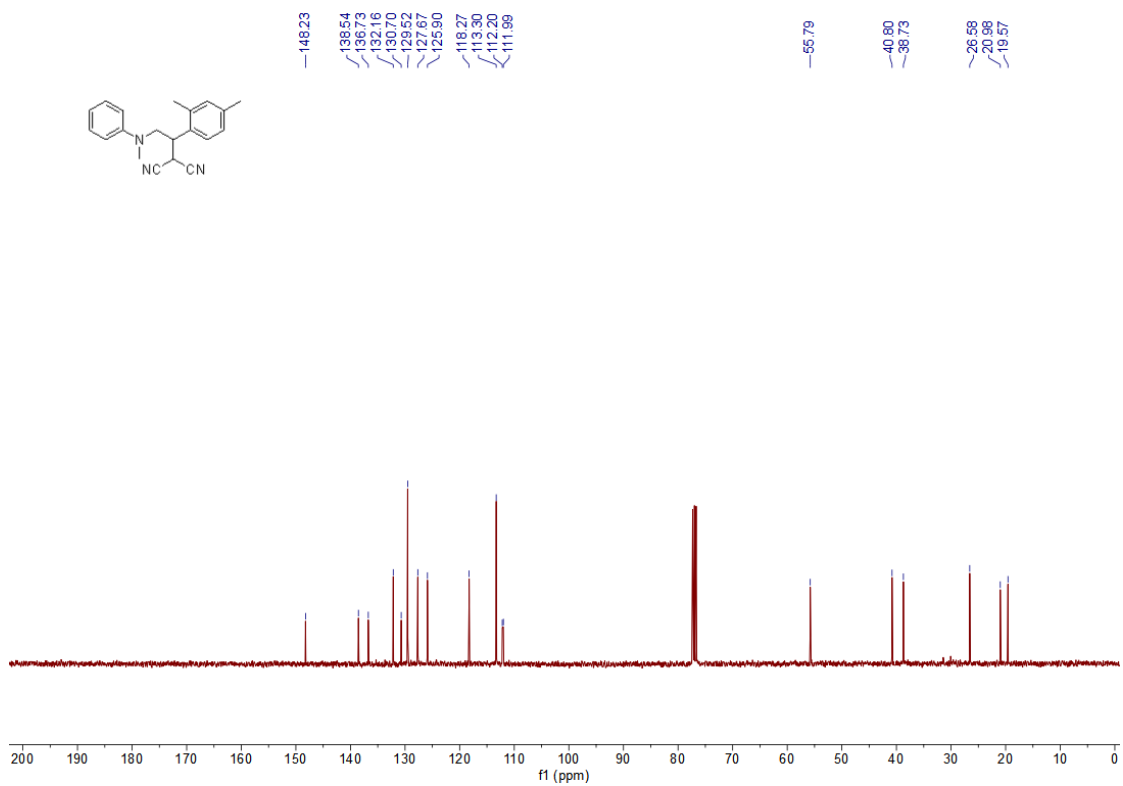

### <sup>1</sup>H NMR Spectrum of **3h**

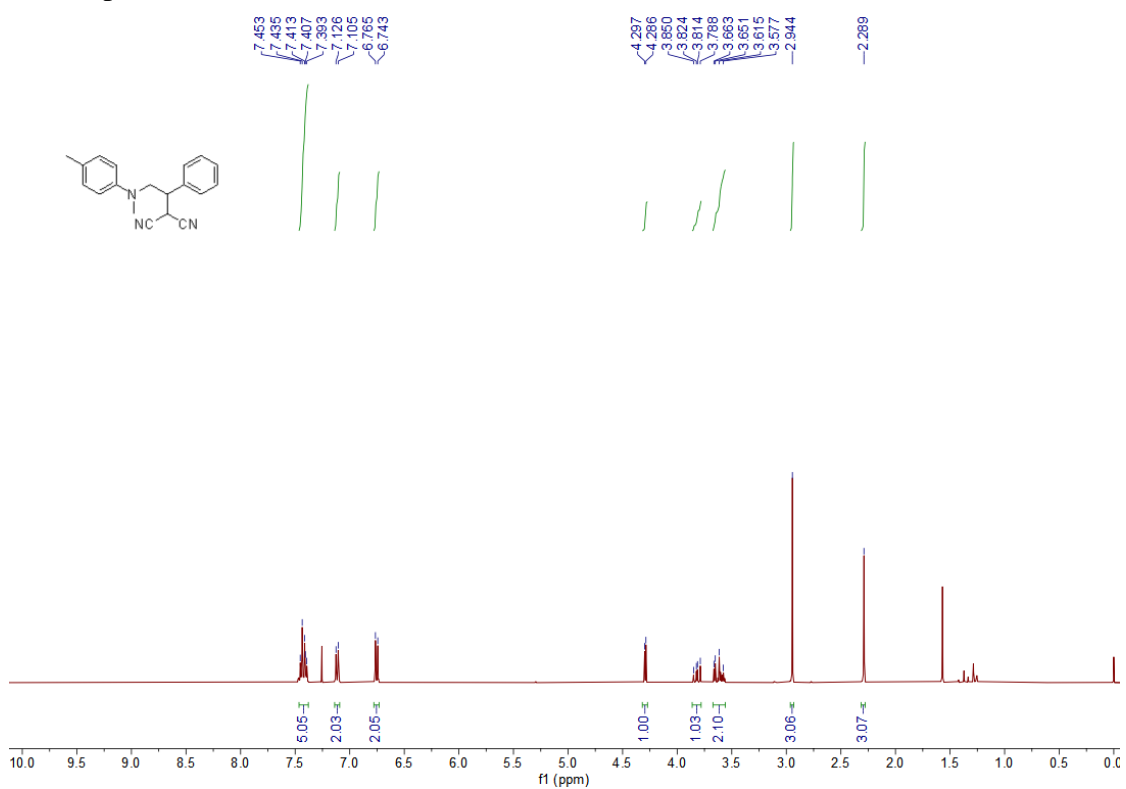

### <sup>1</sup>H NMR Spectrum of **3i**

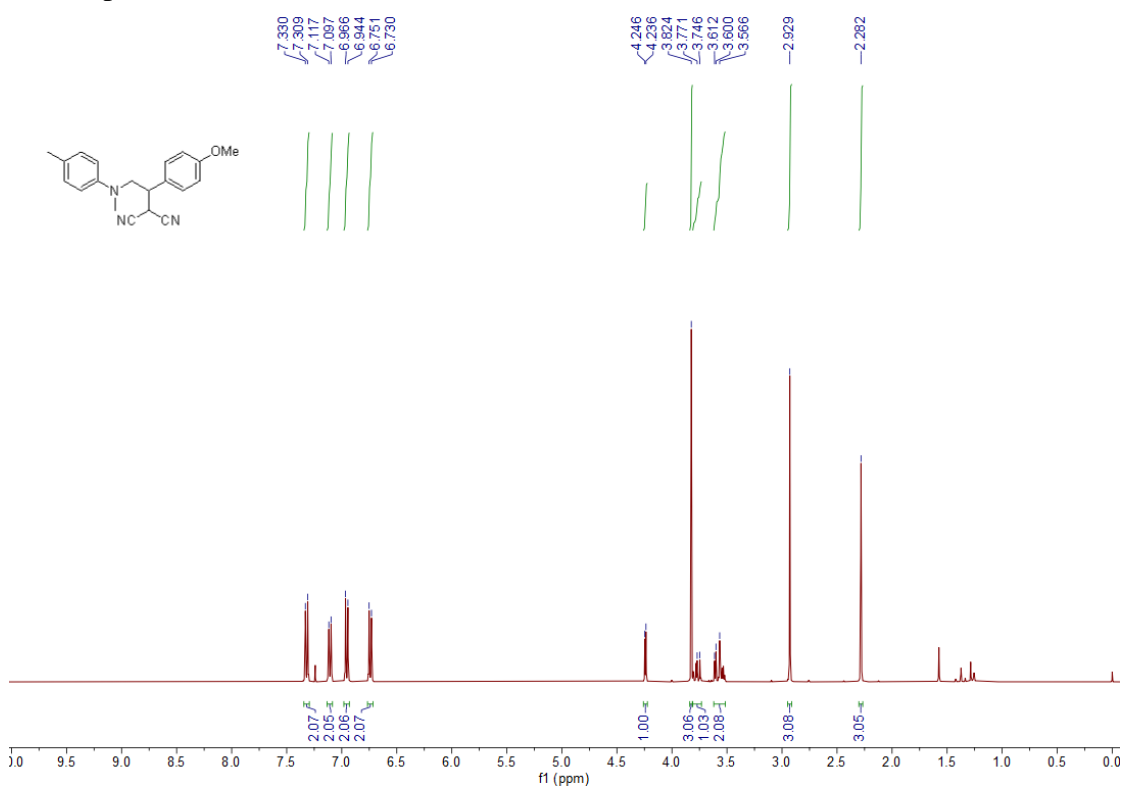

### <sup>1</sup>H NMR Spectrum of **3j**

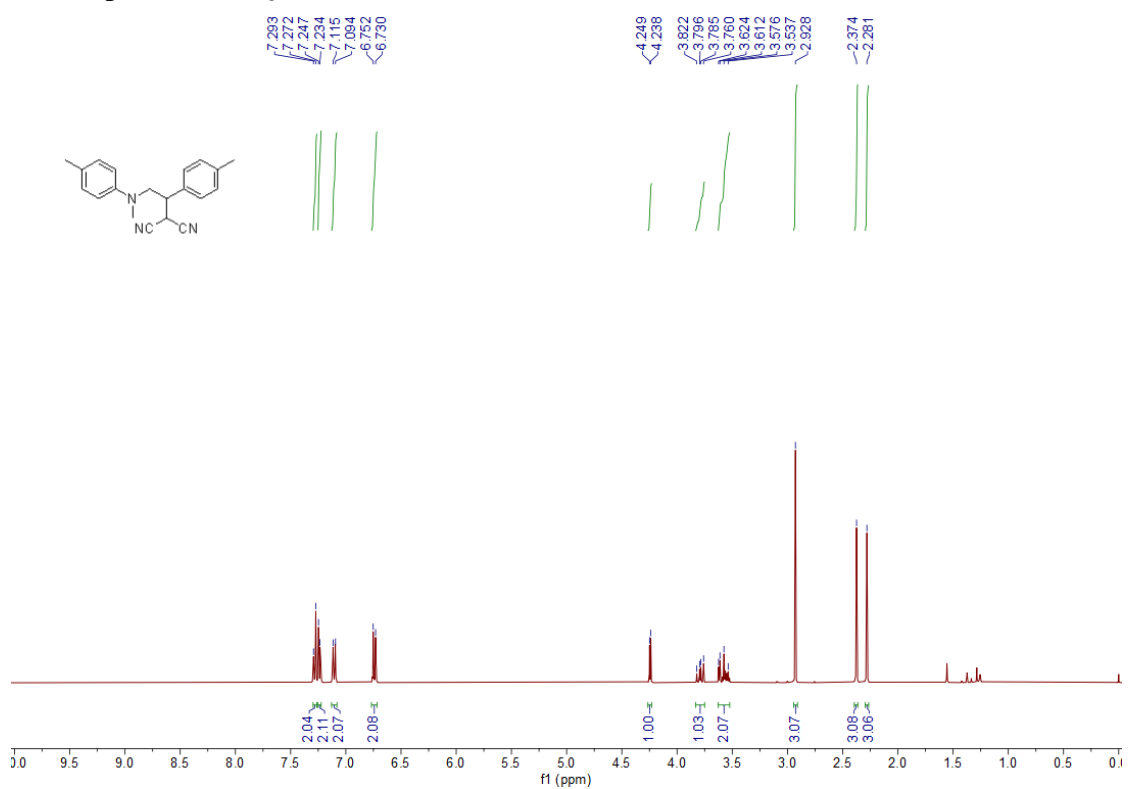

### <sup>1</sup>H NMR Spectrum of **3k**

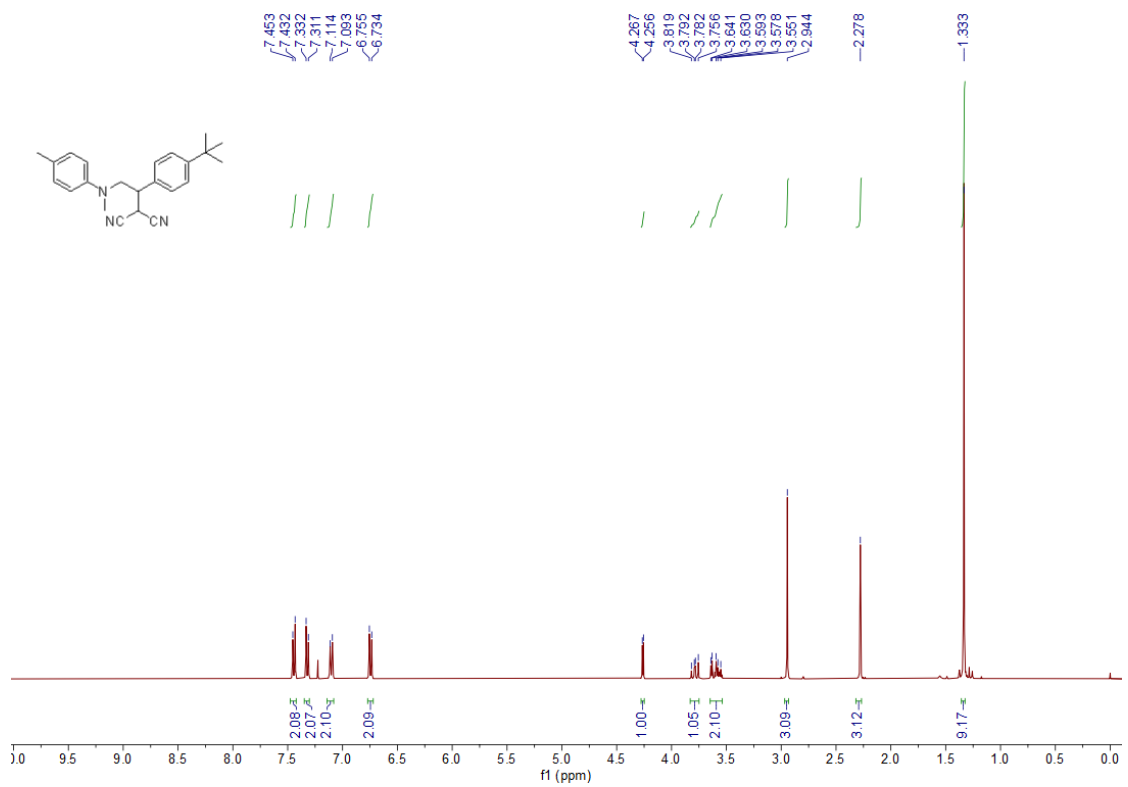

### <sup>1</sup>H NMR Spectrum of **31**

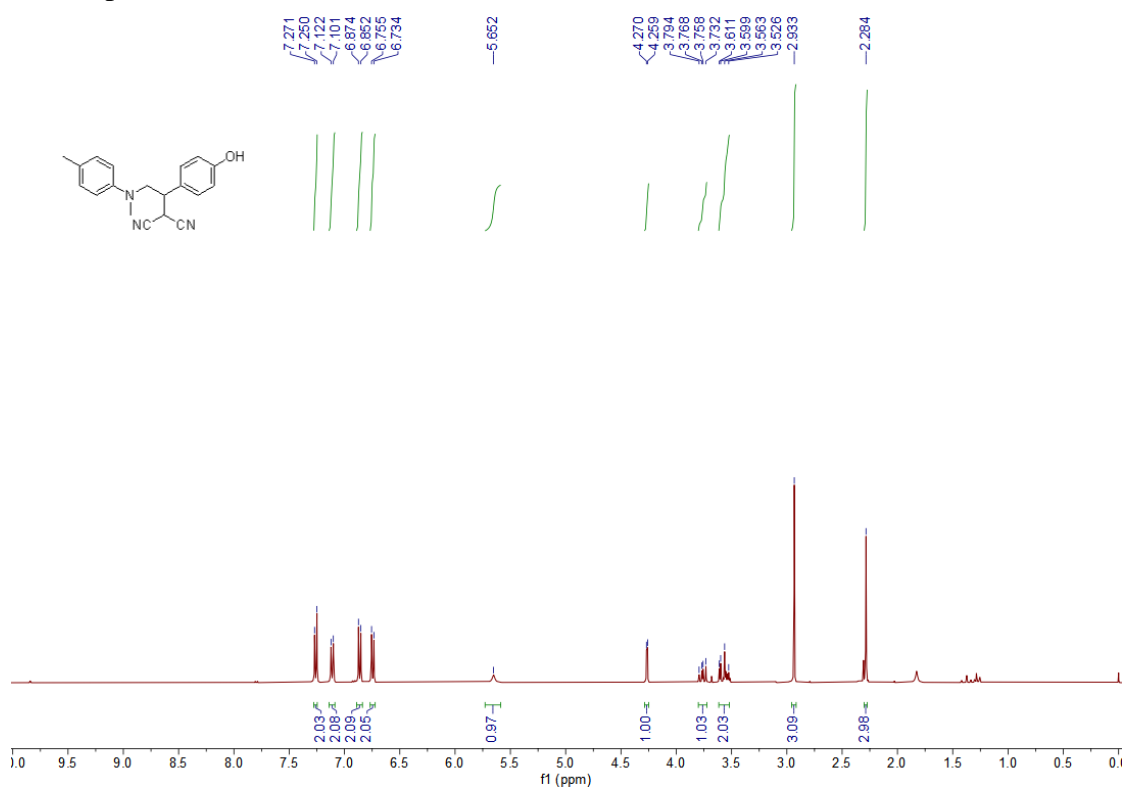

### <sup>13</sup>C NMR Spectrum of **31**

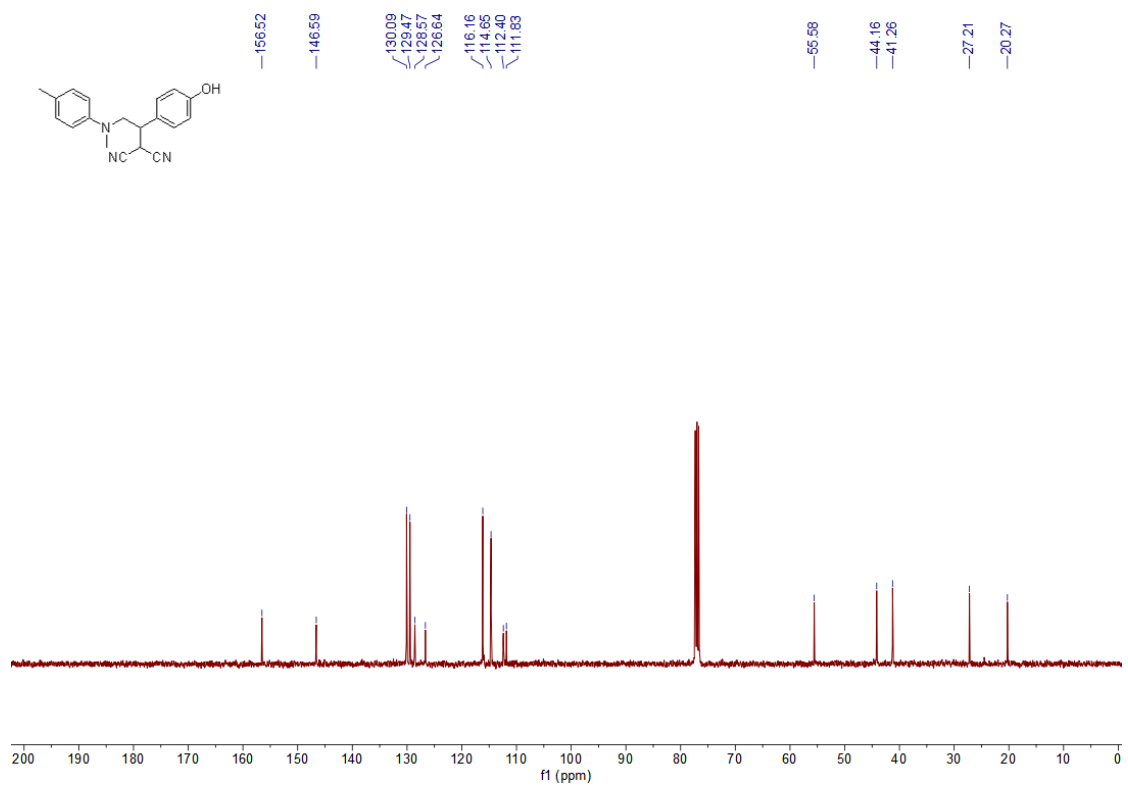

### <sup>1</sup>H NMR Spectrum of **3m**

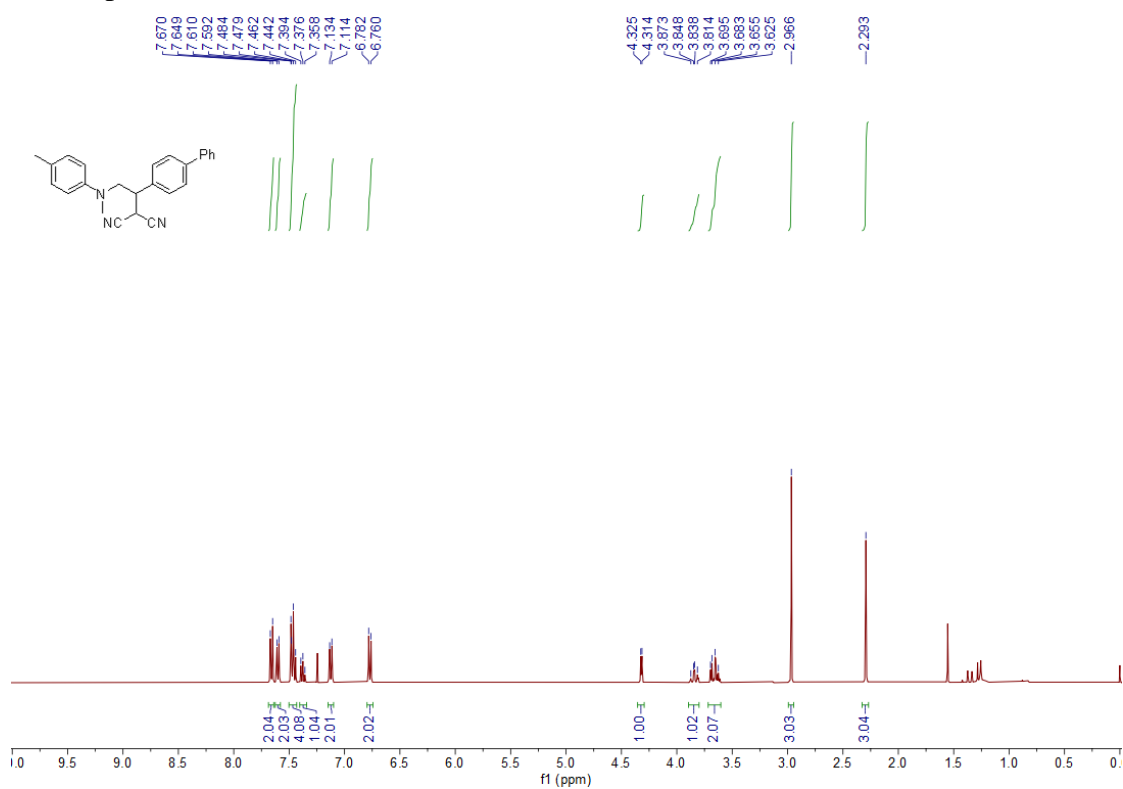

### <sup>1</sup>H NMR Spectrum of **3n**

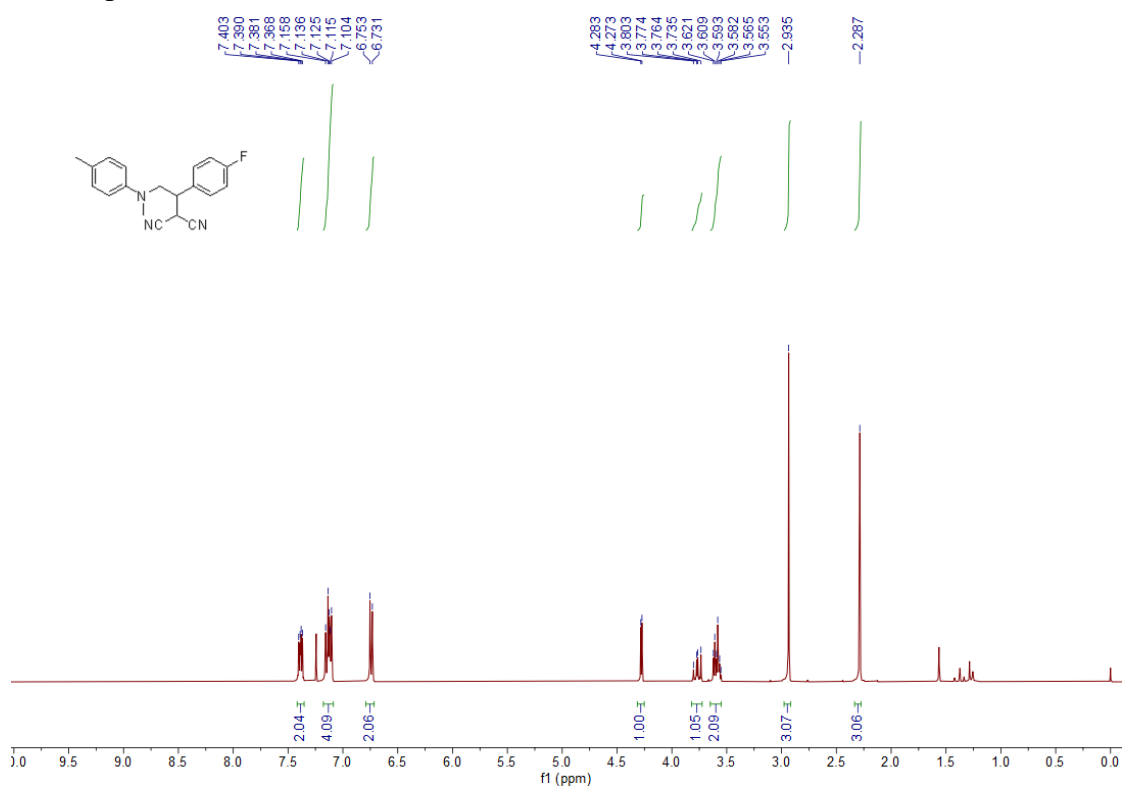

### <sup>1</sup>H NMR Spectrum of **3o**

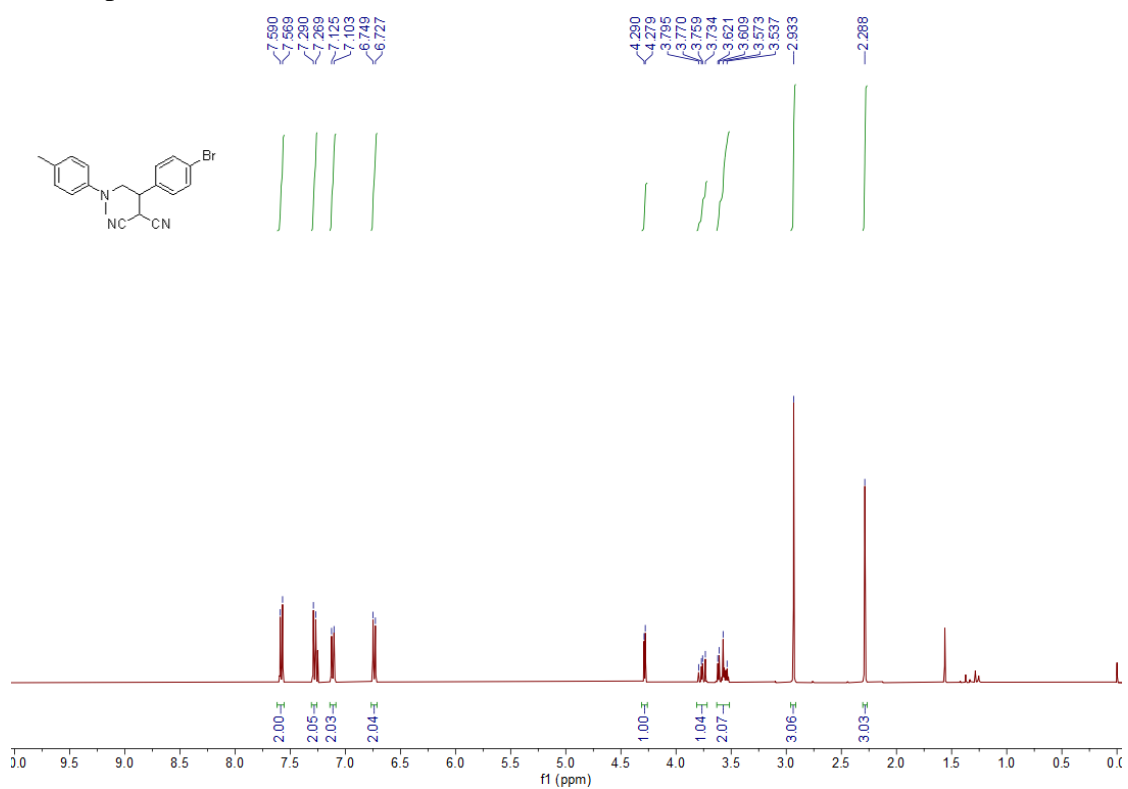

### <sup>1</sup>H NMR Spectrum of **3p**

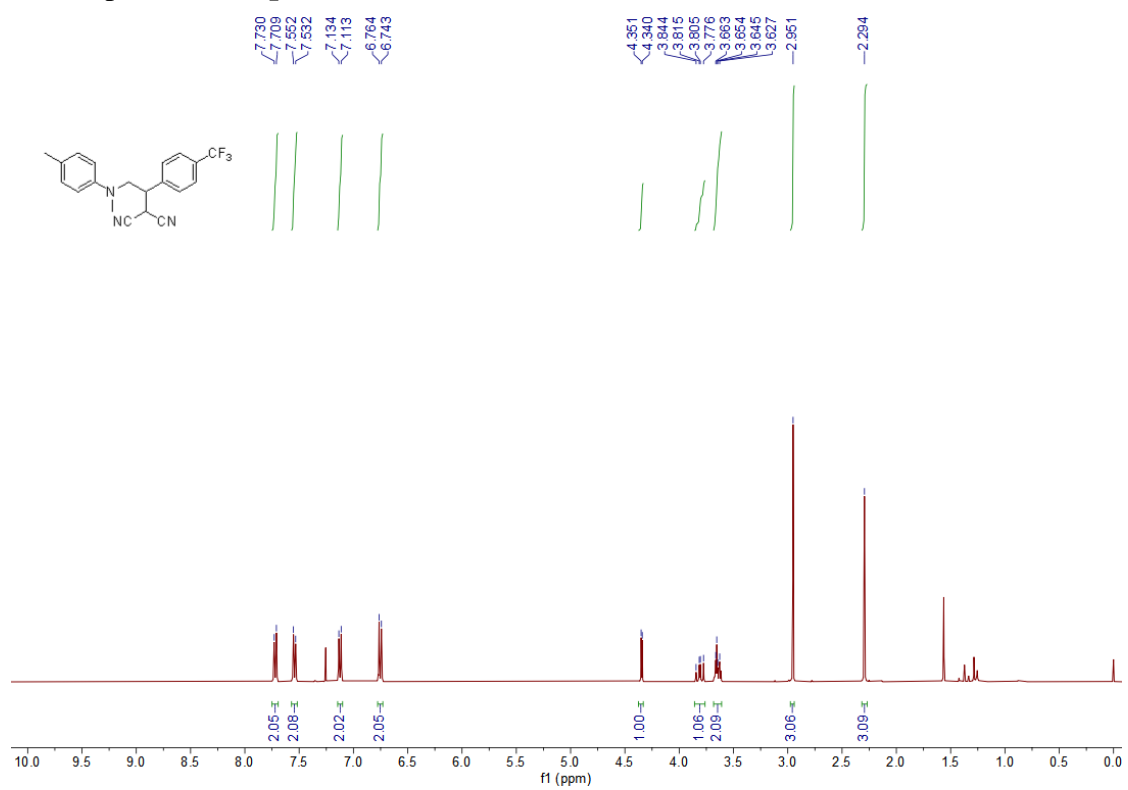

### <sup>1</sup>H NMR Spectrum of **3q**

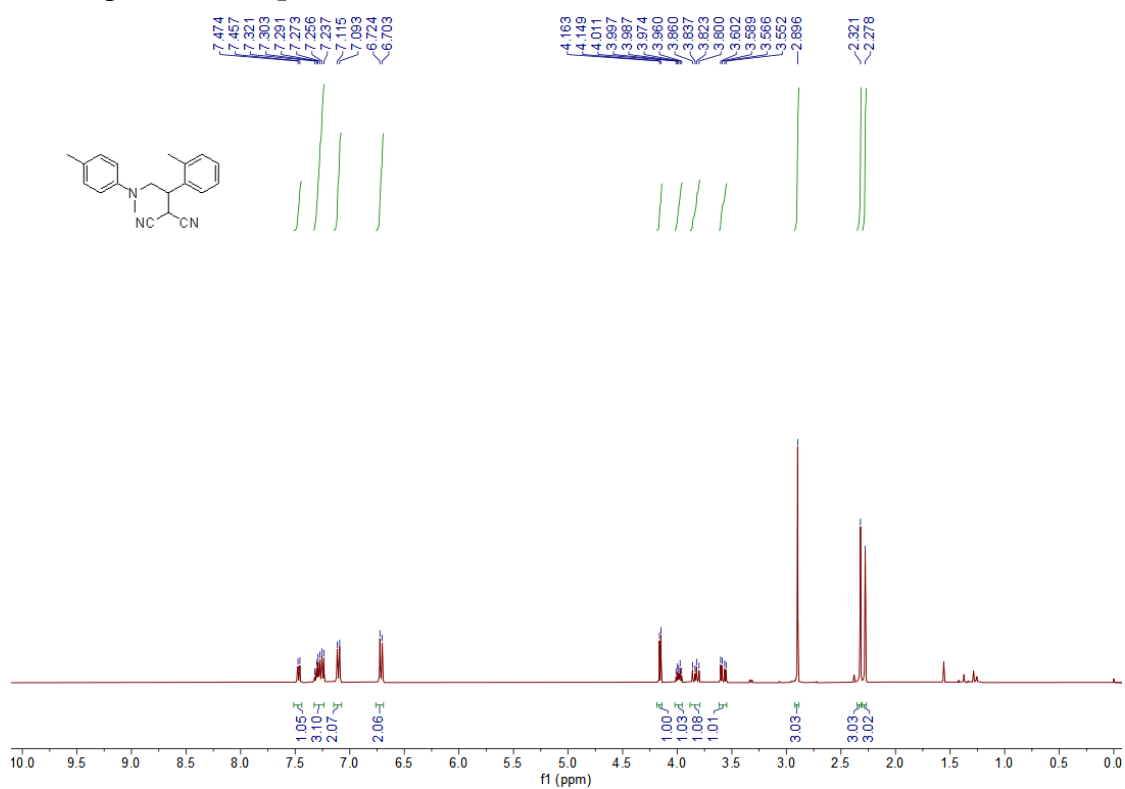

### <sup>1</sup>H NMR Spectrum of **3r**

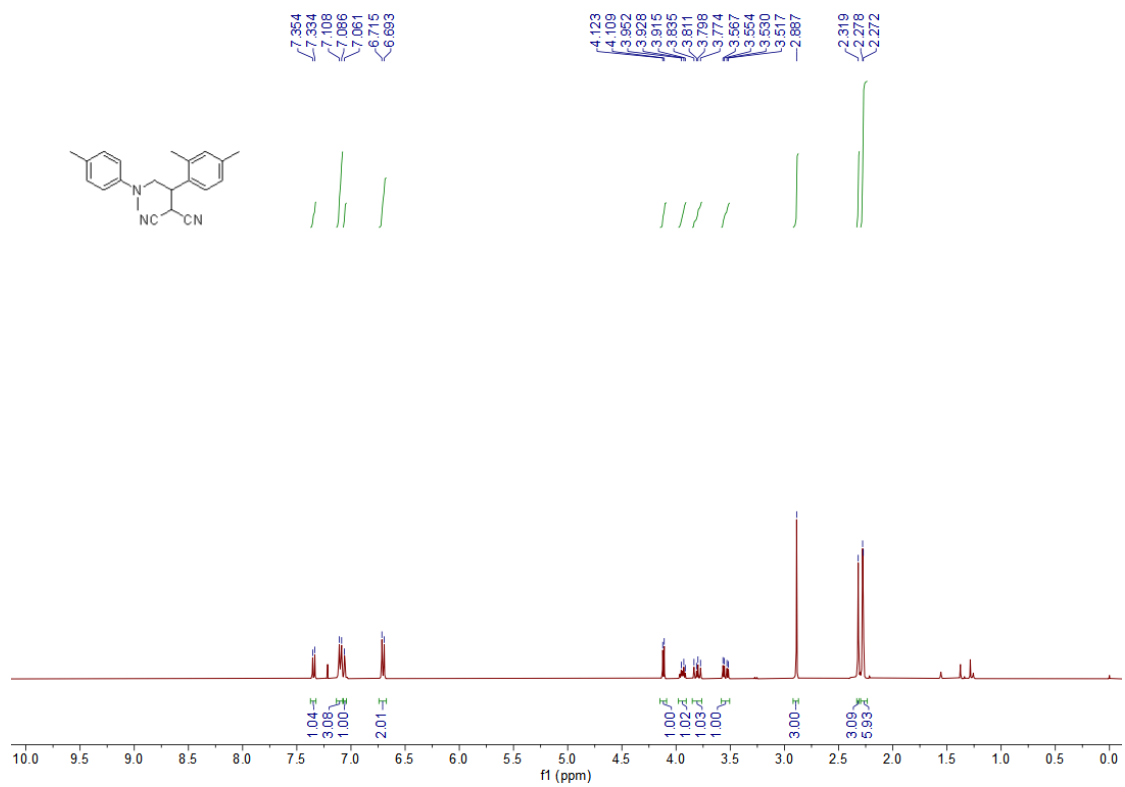



### $^{13}\text{C}$ NMR Spectrum of **3r**

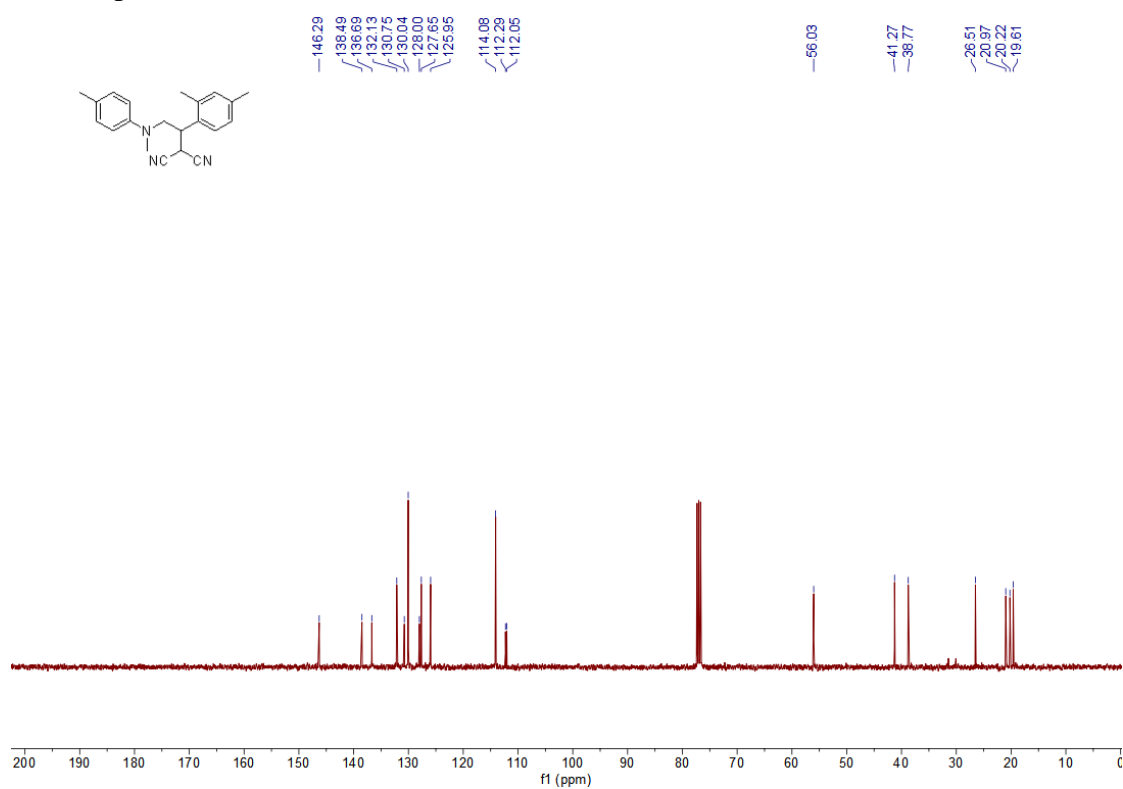

### $^1\text{H}$ NMR Spectrum of **3s**

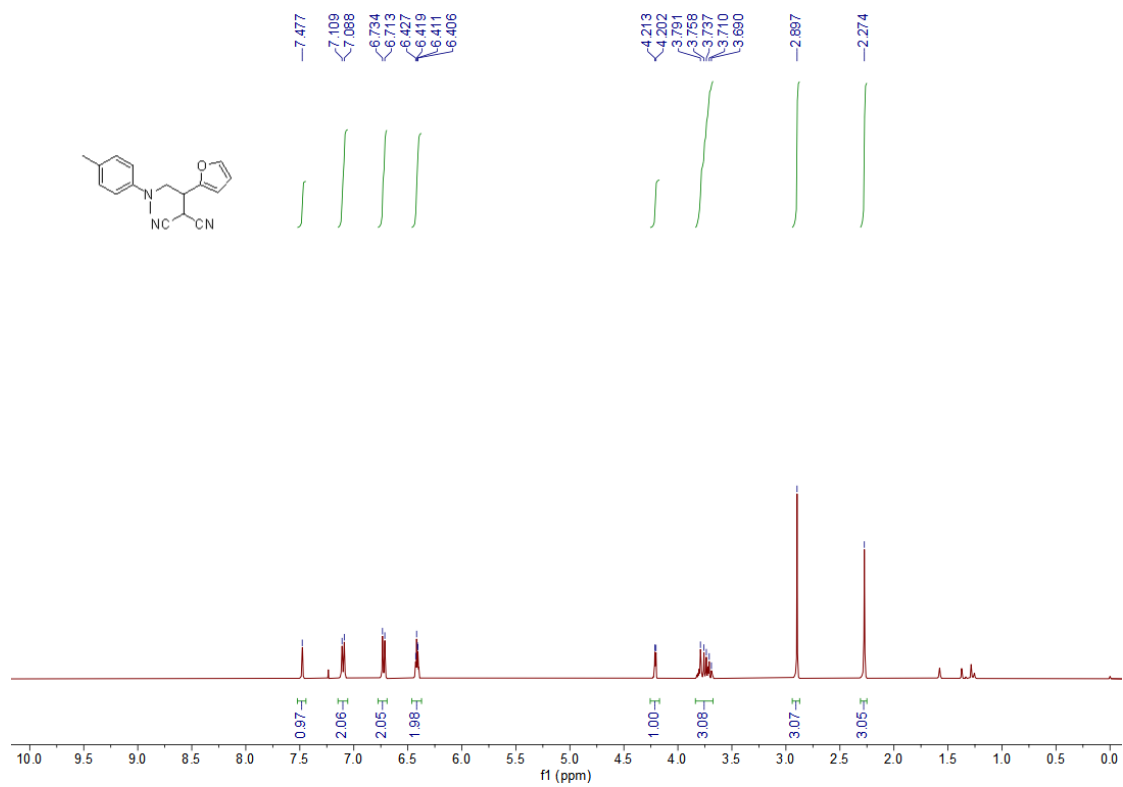

### <sup>13</sup>C NMR Spectrum of **3s**

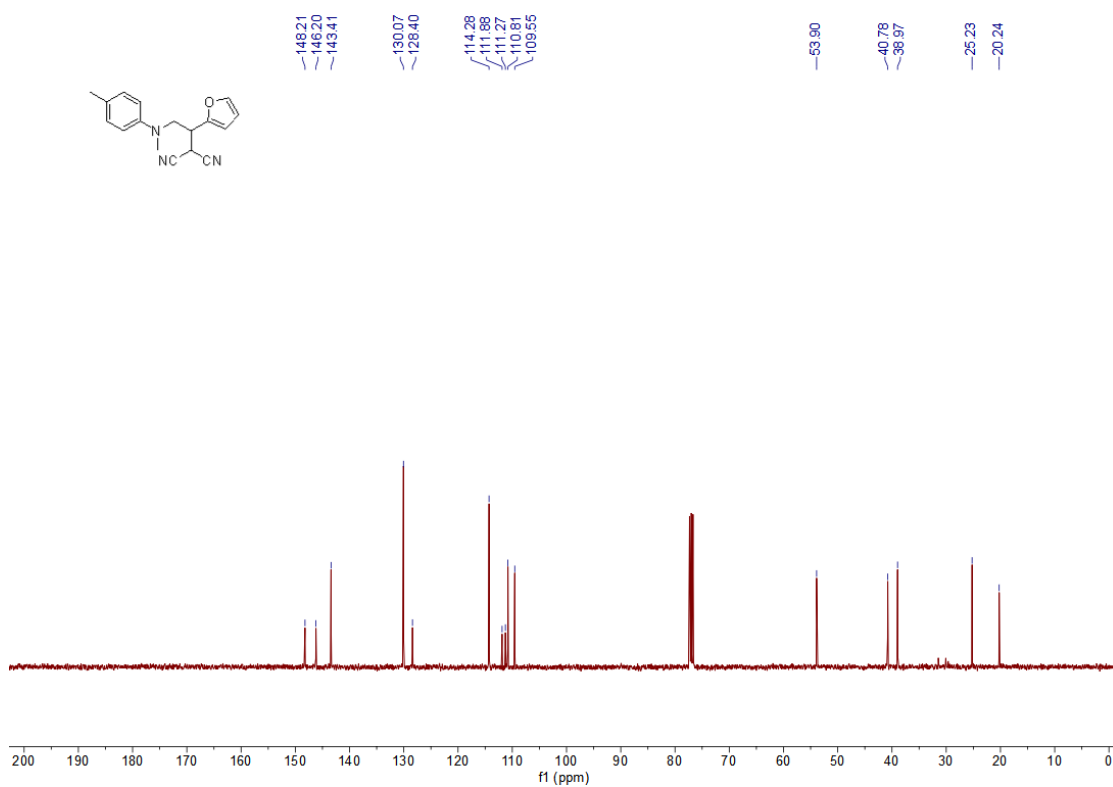

### <sup>1</sup>H NMR Spectrum of **3t**

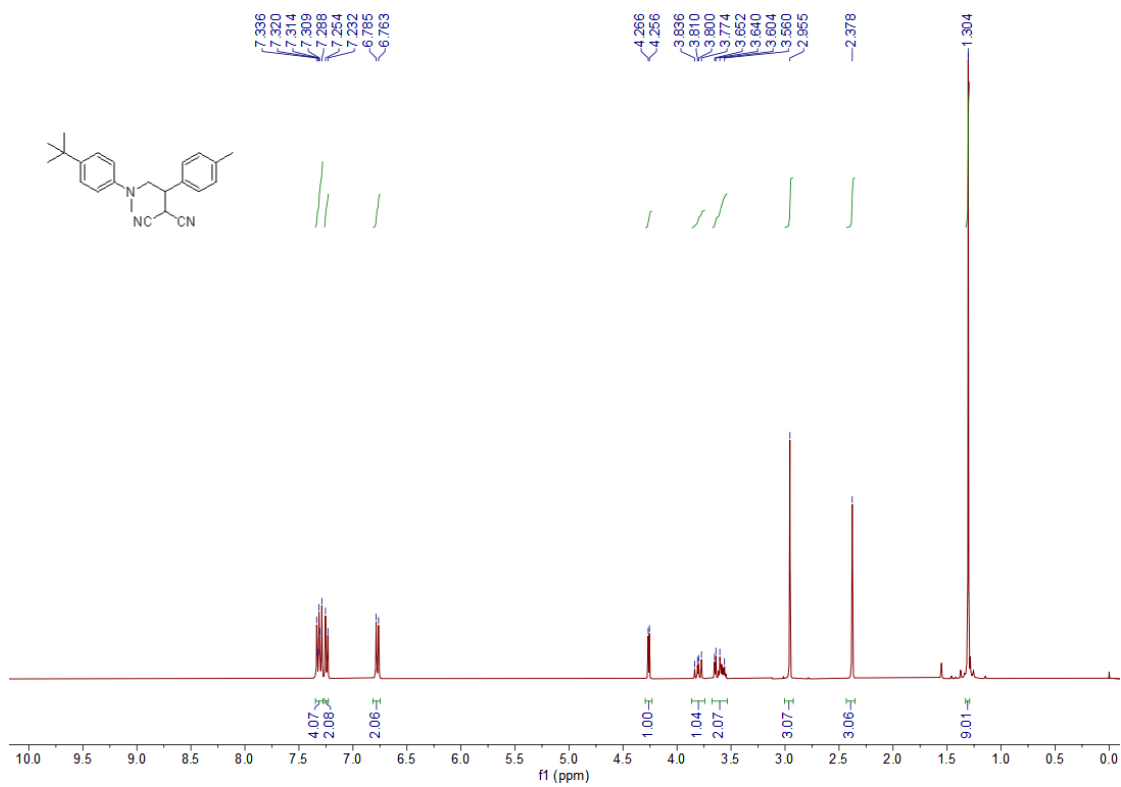

### <sup>1</sup>H NMR Spectrum of **3u**

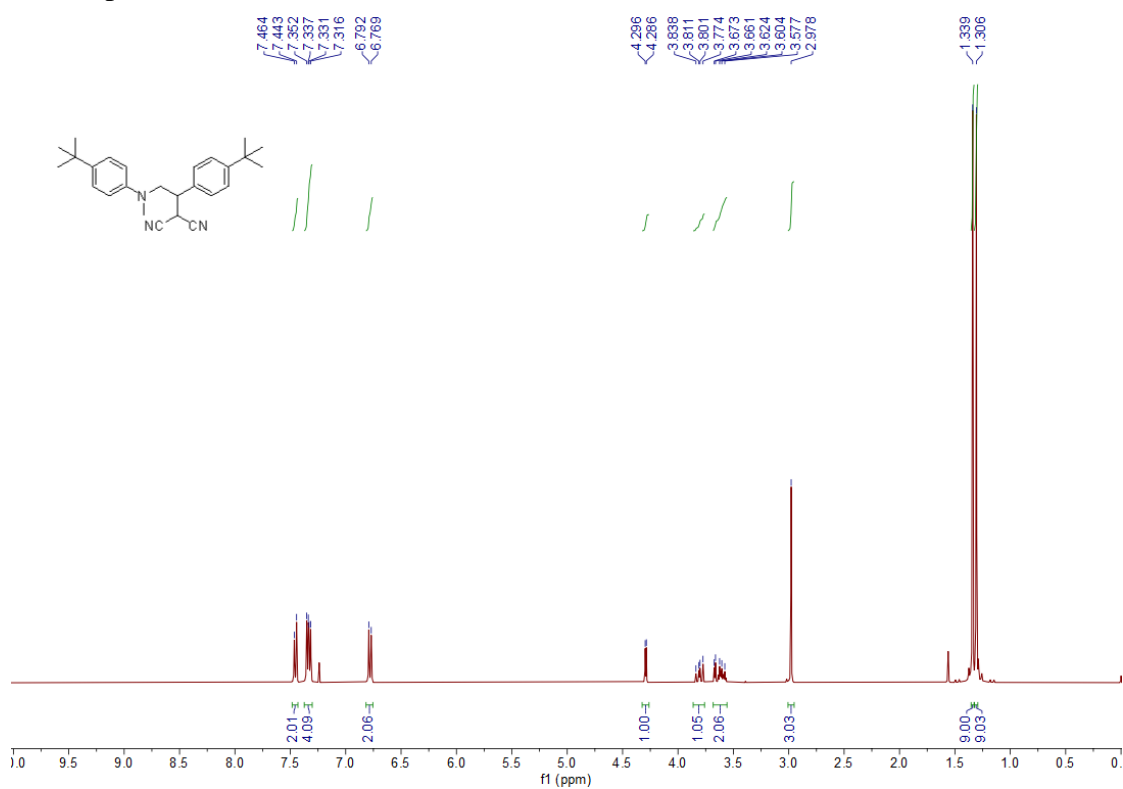

### <sup>1</sup>H NMR Spectrum of **3v**

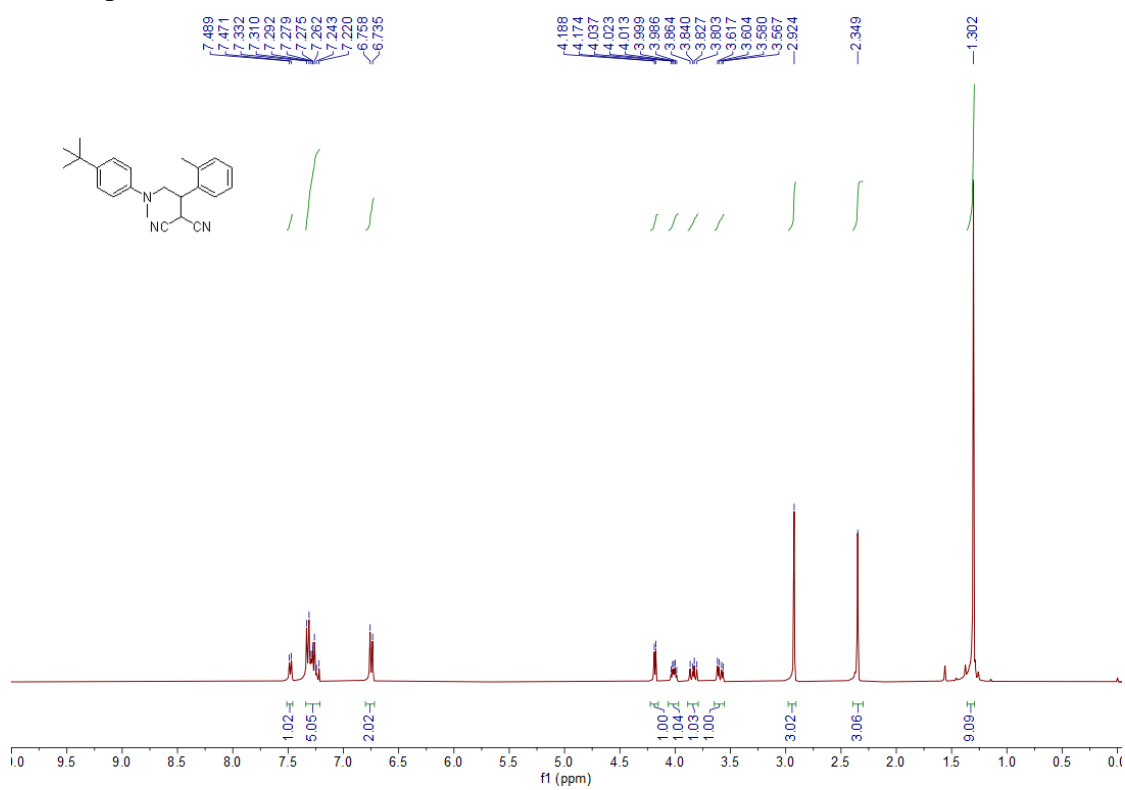

<sup>1</sup>H NMR Spectrum of **3w**

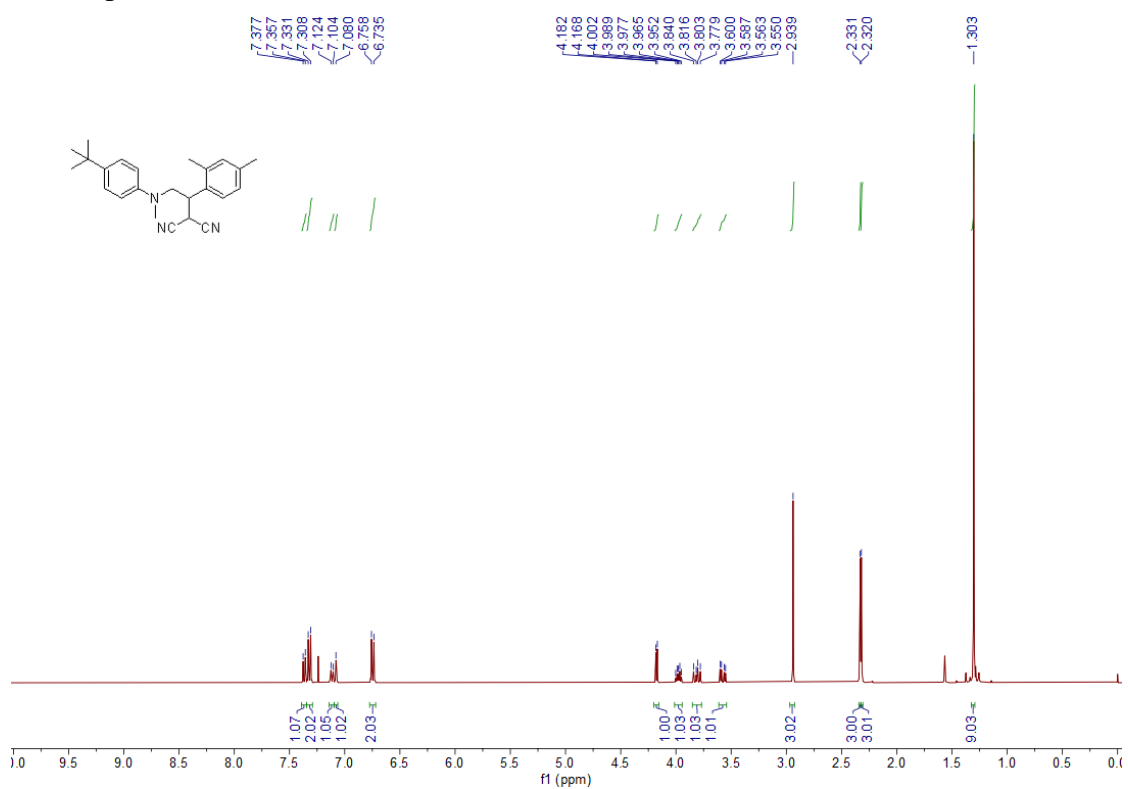

<sup>1</sup>H NMR Spectrum of **3x**

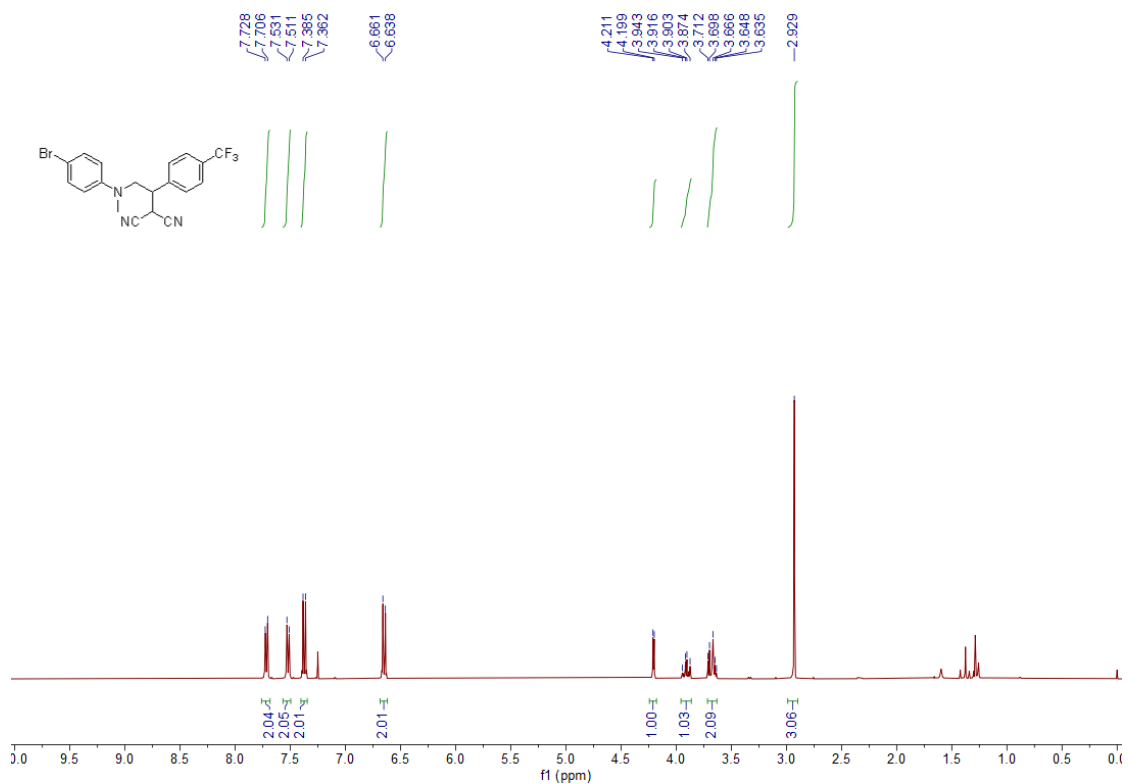

Supplement: d2gc00107a1.pdf [file d2gc00107a1.pdf]
